# Supplementary material for: Infection with a newly designed dual fluorescent reporter HIV-1 effectively identifies latently infected CD4+ T cells
Source: eLife journal article supplement (doi:10.7554/elife.63810), 2021-04-09
Supplement: supp [file elife-63810-supp-v1.zip]

Archive with 9 entries (9 files):
- elife_poa_e63810_Transparent_Reporting_File.pdf
- elife_poa_e63810_Figure_2_figure_supplement_1.pdf
- elife_poa_e63810_Figure_4_figure_supplement_1.pdf
- elife_poa_e63810_Figure_6_figure_supplement_1.pdf
- elife_poa_e63810_Figure_6_figure_supplement_2.pdf
- elife_poa_e63810_Figure_6_figure_supplement_3.pdf
- elife_poa_e63810_Supplementary_file_1.xlsx
- elife_poa_e63810_Supplementary_file_2.xlsx
- elife_poa_e63810_Figure_6_source_data_1.docx
