# Supplementary material for: Infection with a newly designed dual fluorescent reporter HIV-1 effectively identifies latently infected CD4+ T cells
Source: eLife journal article supplement (doi:10.7554/elife.63810), 2021-04-09
Supplement: supp [file elife-63810-supp-v1.zip › elife_poa_e63810_Supplementary_file_1.xlsx]

## Sheet: Pos_Trans_HIV
Chr	Pos_GRCh38	strand	count	percentage
chr1	77946384	-	27405	0.460202
chr19	34441293	+	26196	0.439899
chr17	82208353	-	189	0.0031738
chr3	17402189	+	157	0.00263644
chr10	77652942	+	27	0.000453401
chr7	75802179	+	27	0.000453401
chr19	35221424	-	25	0.000419815
chr2	47793911	-	25	0.000419815
chr7	14296209	-	25	0.000419815
chr19	13205895	-	24	0.000403023
chr10	31060961	+	24	0.000403023
chr18	41755470	-	23	0.00038623
chr7	67250951	-	23	0.00038623
chr11	67093263	+	23	0.00038623
chr1	45578071	+	22	0.000369437
chr4	76277323	+	22	0.000369437
chr20	33557188	-	21	0.000352645
chr6	45393610	-	21	0.000352645
chr15	63989195	+	21	0.000352645
chr15	84663571	+	21	0.000352645
chr19	37355370	-	20	0.000335852
chr2	205248786	-	20	0.000335852
chr15	75039964	-	19	0.00031906
chr19	4253986	-	19	0.00031906
chr22	33033160	-	19	0.00031906
chr3	97990528	-	19	0.00031906
chrX	17731409	-	19	0.00031906
chr18	154597	+	19	0.00031906
chr16	15736459	-	18	0.000302267
chr2	65883211	-	18	0.000302267
chr2	174453498	+	18	0.000302267
chr12	8239626	-	17	0.000285474
chr15	66610850	-	17	0.000285474
chr17	40512923	-	17	0.000285474
chr3	128558728	-	17	0.000285474
chr4	123915120	-	17	0.000285474
chr14	81228545	+	17	0.000285474
chr1	91035593	-	16	0.000268682
chr12	42076228	-	16	0.000268682
chr3	61971233	-	16	0.000268682
chr1	181505552	-	15	0.000251889
chr13	23138522	-	15	0.000251889
chr2	86923214	-	15	0.000251889
chr2	238050879	-	15	0.000251889
chr22	34586839	-	15	0.000251889
chr10	86875212	+	15	0.000251889
chr11	133207138	+	15	0.000251889
chr14	95613181	+	15	0.000251889
chr17	57324014	+	15	0.000251889
chr4	62396644	+	15	0.000251889
chr12	74840541	-	14	0.000235097
chr16	30719084	-	14	0.000235097
chr10	38092368	+	14	0.000235097
chr11	107862245	+	14	0.000235097
chr12	110121105	+	14	0.000235097
chr15	85472209	+	14	0.000235097
chr6	145983183	+	14	0.000235097
chrX	112788127	+	14	0.000235097
chr1	61930888	-	13	0.000218304
chr1	173928094	-	13	0.000218304
chr12	132596815	-	13	0.000218304
chr14	20779529	-	13	0.000218304
chr2	68143059	-	13	0.000218304
chr2	207595745	-	13	0.000218304
chr20	45351127	-	13	0.000218304
chr6	39928344	-	13	0.000218304
chr8	23131355	-	13	0.000218304
chr8	110294118	-	13	0.000218304
chr9	68831854	-	13	0.000218304
chr14	21316959	+	13	0.000218304
chr14	55393223	+	13	0.000218304
chr22	38648812	+	13	0.000218304
chr4	26703799	+	13	0.000218304
chr4	40169087	+	13	0.000218304
chr13	20341495	-	12	0.000201511
chr13	21697987	-	12	0.000201511
chr14	73941886	-	12	0.000201511
chr15	58936394	-	12	0.000201511
chr16	71662004	-	12	0.000201511
chr17	58580492	-	12	0.000201511
chr19	32688878	-	12	0.000201511
chr2	143490180	-	12	0.000201511
chr2	153124686	-	12	0.000201511
chr3	57103885	-	12	0.000201511
chr3	160610402	-	12	0.000201511
chr8	8534568	-	12	0.000201511
chr1	25589143	+	12	0.000201511
chr1	39185129	+	12	0.000201511
chr1	232597528	+	12	0.000201511
chr10	35033574	+	12	0.000201511
chr12	623870	+	12	0.000201511
chr14	91415558	+	12	0.000201511
chr16	88756607	+	12	0.000201511
chr17	16355935	+	12	0.000201511
chr18	13682708	+	12	0.000201511
chr22	49545447	+	12	0.000201511
chr4	19478714	+	12	0.000201511
chr4	55828682	+	12	0.000201511
chr6	81178453	+	12	0.000201511
chr8	80461874	+	12	0.000201511
chr1	42827350	-	11	0.000184719
chr1	85519271	-	11	0.000184719
chr10	7798587	-	11	0.000184719
chr10	31949977	-	11	0.000184719
chr10	43367366	-	11	0.000184719
chr10	68916864	-	11	0.000184719
chr12	123405999	-	11	0.000184719
chr13	89374441	-	11	0.000184719
chr17	30320216	-	11	0.000184719
chr3	13479069	-	11	0.000184719
chr5	110885553	-	11	0.000184719
chr16	62513269	+	11	0.000184719
chr18	33001351	+	11	0.000184719
chr20	51163708	+	11	0.000184719
chr3	142435235	+	11	0.000184719
chr4	15649417	+	11	0.000184719
chr5	43064453	+	11	0.000184719
chr1	13864381	-	10	0.000167926
chr1	165479242	-	10	0.000167926
chr11	79732392	-	10	0.000167926
chr12	110471269	-	10	0.000167926
chr13	33341969	-	10	0.000167926
chr17	32484699	-	10	0.000167926
chr17	44244177	-	10	0.000167926
chr2	139541435	-	10	0.000167926
chr20	46003513	-	10	0.000167926
chr7	26163527	-	10	0.000167926
chr7	73688074	-	10	0.000167926
chr7	134218142	-	10	0.000167926
chr10	22056885	+	10	0.000167926
chr11	116966845	+	10	0.000167926
chr19	33295071	+	10	0.000167926
chr4	186806067	+	10	0.000167926
chr8	97433258	+	10	0.000167926
chr8	115333314	+	10	0.000167926
