# Supplementary material for: Infection with a newly designed dual fluorescent reporter HIV-1 effectively identifies latently infected CD4+ T cells
Source: eLife journal article supplement (doi:10.7554/elife.63810), 2021-04-09
Supplement: supp [file elife-63810-supp-v1.zip › elife_poa_e63810_Supplementary_file_2.xlsx]

## Sheet: Pos_Trans_30days
Chr	Pos_GRCh38	strand	count	percentage
chr18	11390567	-	45216	0.0898964
chr3	17402182	+	16919	0.0336376
chr8	120514837	-	6092	0.0121118
chr17	82472256	+	5028	0.00999644
chr17	82472261	-	5000	0.00994077
chr16	23869787	-	4104	0.00815939
chr8	144293974	-	3984	0.00792081
chr17	47176490	-	3776	0.00750727
chr22	20830393	+	3111	0.00618515
chr1	31912787	+	3023	0.00601019
chr10	119774909	+	2199	0.00437195
chr5	87312228	-	2099	0.00417314
chr17	4219483	+	2067	0.00410952
chr7	129621715	-	2047	0.00406975
chrX	45769274	+	2012	0.00400017
chr20	63718476	-	1990	0.00395643
chr17	4323206	-	1870	0.00371785
chr17	75523784	-	1857	0.003692
chr2	161322826	-	1851	0.00368007
chr22	21586419	-	1810	0.00359856
chr7	92656418	+	1783	0.00354488
chr17	81864013	+	1714	0.0034077
chr12	10606148	-	1669	0.00331823
chr3	130363650	+	1661	0.00330232
chr3	32699613	+	1496	0.00297428
chr1	11016270	+	1491	0.00296434
chr3	71494289	-	1485	0.00295241
chr17	8119232	-	1465	0.00291265
chr2	59311287	-	1427	0.0028371
chr7	1519317	-	1410	0.0028033
chr12	49384376	-	1365	0.00271383
chr19	4699733	-	1315	0.00261442
chr17	18594117	+	1313	0.00261045
chr9	3487063	-	1284	0.00255279
chr17	80323323	-	1249	0.00248321
chr7	129621710	+	1248	0.00248122
chr14	52520592	-	1236	0.00245736
chr12	10606143	+	1217	0.00241958
chr16	3763656	-	1185	0.00235596
chr3	49774502	-	1144	0.00227445
chr10	96052194	-	1136	0.00225854
chr3	30688321	-	1131	0.0022486
chr16	1805606	-	1130	0.00224661
chr22	21586414	+	1122	0.00223071
chr16	604113	+	1108	0.00220288
chr13	21530691	-	1061	0.00210943
chr19	2463625	-	1036	0.00205973
chr17	2452728	+	1004	0.00199611
chr21	44041196	-	1001	0.00199014
chr19	47185245	-	995	0.00197821
chr11	9282437	+	950	0.00188875
chr4	36225714	-	929	0.001847
chr11	63239084	+	894	0.00177741
chr15	41668737	-	891	0.00177145
chr4	158670710	+	883	0.00175554
chr14	45219176	-	880	0.00174958
chr11	654712	-	878	0.0017456
chr13	86776151	+	872	0.00173367
chr9	128897957	-	862	0.00171379
chr19	5954258	-	858	0.00170584
chr22	37664855	-	852	0.00169391
chr14	49827672	+	850	0.00168993
chr12	124603391	+	850	0.00168993
chr1	155488970	+	839	0.00166806
chr13	98487014	-	835	0.00166011
chr1	40251028	-	833	0.00165613
chr14	97904046	+	817	0.00162432
chr9	130010716	-	787	0.00156468
chr14	23492158	+	775	0.00154082
chr16	88594798	-	767	0.00152491
chr19	49859604	-	745	0.00148118
chr10	96052189	+	745	0.00148118
chr17	81449956	-	740	0.00147123
chr19	2274895	-	729	0.00144936
chr5	70785293	+	725	0.00144141
chr3	22437953	+	724	0.00143942
chr2	213051722	-	723	0.00143744
chr7	95498459	+	720	0.00143147
chr11	63637712	-	716	0.00142352
chr16	89788093	-	711	0.00141358
chr5	154950804	-	709	0.0014096
chr14	49827677	-	700	0.00139171
chr8	102358132	-	699	0.00138972
chr6	73521266	-	696	0.00138376
chr1	9819825	+	694	0.00137978
chr17	2667060	+	692	0.0013758
chr15	79863155	-	685	0.00136189
chr19	1073102	-	676	0.00134399
chr7	95498464	-	676	0.00134399
chr5	98215396	-	671	0.00133405
chr1	40251023	+	662	0.00131616
chr5	40775494	-	661	0.00131417
chr1	1218652	-	660	0.00131218
chr11	67685107	-	656	0.00130423
chr12	821843	-	654	0.00130025
chrX	38628782	+	651	0.00129429
chr17	16721263	-	650	0.0012923
chr12	4330179	-	644	0.00128037
chr14	61724752	+	644	0.00128037
chr12	25351118	+	633	0.0012585
chr20	33384585	+	628	0.00124856
chr19	55423392	+	627	0.00124657
chr16	4844582	+	625	0.0012426
chr12	25351123	-	609	0.00121079
chr11	956360	+	607	0.00120681
chr20	2893476	+	606	0.00120482
chr17	7344970	-	604	0.00120085
chr9	121910248	+	602	0.00119687
chr12	6573041	-	598	0.00118892
chr4	76979034	+	598	0.00118892
chr11	68177314	-	589	0.00117102
chr16	604118	-	578	0.00114915
chr5	138805998	+	575	0.00114319
chr1	97604817	-	574	0.0011412
chr14	32152798	+	574	0.0011412
chr20	3550255	+	571	0.00113524
chr2	98678213	-	569	0.00113126
chr12	53603255	+	569	0.00113126
chr17	51048643	-	565	0.00112331
chr11	65723024	+	561	0.00111535
chr7	151476553	+	559	0.00111138
chrX	154077657	-	556	0.00110541
chr9	136454008	+	556	0.00110541
chrX	148679151	+	554	0.00110144
chr18	70175077	+	552	0.00109746
chr15	63541596	-	549	0.0010915
chr4	151672866	-	544	0.00108156
chr19	1084975	+	543	0.00107957
chr17	2653104	+	536	0.00106565
chr21	46482031	-	535	0.00106366
chr16	47117375	-	533	0.00105969
chr3	47030699	-	528	0.00104975
chr1	31047228	+	528	0.00104975
chr19	5636174	-	522	0.00103782
chr19	5954253	+	522	0.00103782
chr22	42514207	-	516	0.00102589
chr8	144286992	+	514	0.00102191
chr7	7239836	+	512	0.00101794
chr13	95710605	+	512	0.00101794
chr13	32616832	-	510	0.00101396
chr2	26050590	+	509	0.00101197
chr22	40273434	+	504	0.00100203
chr4	42043601	-	502	0.000998054
chr19	21307431	+	502	0.000998054
chr22	21678863	-	501	0.000996065
chr3	52739807	+	501	0.000996065
chr15	77446386	-	497	0.000988113
chr15	75646585	+	494	0.000982148
chr4	2875768	+	491	0.000976184
chr1	161862561	+	491	0.000976184
chr19	21763411	-	487	0.000968231
chr11	63722395	-	486	0.000966243
chr1	158188473	-	481	0.000956302
chr11	65979171	+	480	0.000954314
chr17	4296786	-	475	0.000944373
chr1	45601507	+	475	0.000944373
chr3	129112562	-	468	0.000930456
chr22	50595930	-	467	0.000928468
chr12	88175583	+	465	0.000924492
chr19	34434058	-	460	0.000914551
chr3	48951483	-	460	0.000914551
chr19	38668365	+	460	0.000914551
chr8	67156994	+	460	0.000914551
chr12	110164207	-	457	0.000908587
chr16	15667301	+	455	0.00090461
chr6	89365231	+	454	0.000902622
chr12	21637796	-	443	0.000880752
chr9	125017817	+	438	0.000870812
chr17	14512045	+	436	0.000866835
chr18	10283872	-	429	0.000852918
chr22	41897377	-	428	0.00085093
chr2	113741221	-	425	0.000844966
chr4	48597497	-	422	0.000839001
chr22	17135697	-	421	0.000837013
chr16	89610833	+	415	0.000825084
chr10	27127684	+	414	0.000823096
chr6	87218427	-	411	0.000817132
chr20	35735502	-	410	0.000815143
chr11	118312791	+	408	0.000811167
chr6	69793270	+	406	0.000807191
chr1	91511527	-	405	0.000805203
chr12	50710477	+	398	0.000791286
chr5	127836018	-	397	0.000789297
chr6	80044866	+	394	0.000783333
chr14	65436936	-	387	0.000769416
chr4	138233514	+	387	0.000769416
chr4	1707464	-	386	0.000767428
chr11	94126510	+	386	0.000767428
chr6	25113060	+	385	0.00076544
chr3	45700793	-	380	0.000755499
chr17	50997480	-	379	0.000753511
chr3	60006927	+	379	0.000753511
chr19	49533369	+	377	0.000749534
chr19	39537818	+	373	0.000741582
chr1	12409391	-	372	0.000739594
chr17	80680856	+	372	0.000739594
chr8	143353271	+	371	0.000737605
chr12	48701154	+	370	0.000735617
chr3	30633877	-	369	0.000733629
chr6	119333168	+	367	0.000729653
chr2	233430556	-	366	0.000727665
chr6	119344751	+	366	0.000727665
chr7	2414320	+	365	0.000725676
chr11	68118609	+	365	0.000725676
chr2	113714750	-	362	0.000719712
chr12	849609	-	361	0.000717724
chr3	177059692	+	357	0.000709771
chr12	50605281	+	354	0.000703807
chr17	4219627	+	352	0.00069983
chr9	131412503	+	352	0.00069983
chr19	11046158	-	349	0.000693866
chr16	2438990	-	348	0.000691878
chr6	22252809	+	347	0.00068989
chr7	86925984	+	347	0.00068989
chr2	60970687	-	345	0.000685913
chr19	24042523	+	345	0.000685913
chr6	111837530	+	345	0.000685913
chr18	9125681	+	344	0.000683925
chr15	58645785	-	343	0.000681937
chr19	16360057	-	342	0.000679949
chr8	103383410	-	342	0.000679949
chr17	51231460	+	341	0.000677961
chr12	7008835	+	339	0.000673984
chr19	48621686	-	338	0.000671996
chr19	2604707	+	338	0.000671996
chr16	57043601	+	335	0.000666032
chr17	63727640	-	334	0.000664044
chr16	203410	+	332	0.000660067
chr3	45722098	+	332	0.000660067
chr22	29105695	+	331	0.000658079
chr5	169730349	-	329	0.000654103
chr17	47445359	-	327	0.000650127
chr2	74051754	+	327	0.000650127
chr18	187661	-	324	0.000644162
chr2	190988063	+	323	0.000642174
chr19	6757531	-	322	0.000640186
chr1	243156498	-	322	0.000640186
chr8	98763762	-	321	0.000638198
chr17	7882827	-	319	0.000634221
chr17	82453733	-	317	0.000630245
chr16	89467960	-	317	0.000630245
chr5	134082129	+	316	0.000628257
chr6	22607049	-	315	0.000626269
chr13	39690700	-	313	0.000622292
chrX	81246402	+	313	0.000622292
chr6	30513310	-	311	0.000618316
chr19	49575393	-	311	0.000618316
chr17	37200736	+	310	0.000616328
chr2	112098265	-	309	0.00061434
chr17	76775217	+	309	0.00061434
chr20	33568700	+	307	0.000610363
chr19	35637735	-	306	0.000608375
chr16	68193233	-	306	0.000608375
chr10	17149156	-	304	0.000604399
chr1	32141643	-	304	0.000604399
chr11	62748347	+	303	0.000602411
chr6	87241851	+	302	0.000600423
chr5	181238370	+	302	0.000600423
chr2	198347508	+	301	0.000598435
chrX	79101933	-	299	0.000594458
chr17	40319437	+	299	0.000594458
chr16	29821415	+	297	0.000590482
chr3	49999578	+	293	0.000582529
chr3	60006932	-	292	0.000580541
chr17	4684456	-	291	0.000578553
chr6	30753048	+	291	0.000578553
chr14	35276302	+	290	0.000576565
chr8	81816573	-	288	0.000572589
chr17	8543121	+	285	0.000566624
chr14	103458703	-	284	0.000564636
chr10	130147145	-	282	0.00056066
chr19	650833	+	282	0.00056066
chr13	25326815	+	282	0.00056066
chr22	40846356	-	281	0.000558671
chr1	176024742	+	281	0.000558671
chr16	14515809	-	278	0.000552707
chr19	50406592	+	278	0.000552707
chr10	67905435	+	278	0.000552707
chr1	31010737	+	277	0.000550719
chr9	131695970	+	277	0.000550719
chr22	21597921	+	276	0.000548731
chr17	67903828	+	276	0.000548731
chr17	18512868	+	275	0.000546743
chr13	97996504	-	274	0.000544754
chr1	15959421	+	272	0.000540778
chr18	45886167	-	270	0.000536802
chr17	76148952	+	270	0.000536802
chr21	46501625	+	269	0.000534814
chr15	68295318	-	268	0.000532825
chr17	76776114	+	268	0.000532825
chr14	24294365	-	266	0.000528849
chr14	39381128	+	266	0.000528849
chr11	65854085	-	265	0.000526861
chr5	62320623	-	264	0.000524873
chr19	1073097	+	264	0.000524873
chr12	6876704	-	261	0.000518908
chr19	35637730	+	261	0.000518908
chr11	47525117	+	261	0.000518908
chr2	180987352	+	261	0.000518908
chr16	29824380	-	259	0.000514932
chr11	68528125	+	259	0.000514932
chr9	101557122	+	258	0.000512944
chr11	116987700	-	257	0.000510956
chr3	98011870	+	257	0.000510956
chr1	52509202	+	256	0.000508968
chr8	123030601	-	255	0.000506979
chr2	213124231	-	255	0.000506979
chr17	67214036	+	254	0.000504991
chr17	37106712	-	251	0.000499027
chr8	28876615	+	251	0.000499027
chr16	54707443	+	251	0.000499027
chr8	78538506	+	251	0.000499027
chr8	59275133	-	249	0.00049505
chr1	66980341	-	249	0.00049505
chr1	808265	-	248	0.000493062
chr17	63807422	-	248	0.000493062
chr18	9206692	+	247	0.000491074
chr1	816661	+	246	0.000489086
chr10	17149012	+	245	0.000487098
chr17	81292626	+	245	0.000487098
chr8	47294406	-	244	0.00048511
chr7	150704565	-	244	0.00048511
chr17	28090146	+	243	0.000483122
chr3	3155279	-	242	0.000481133
chr16	67202278	-	242	0.000481133
chr2	96200502	-	242	0.000481133
chr14	103792398	-	240	0.000477157
chr4	53388792	+	240	0.000477157
chr16	610125	+	239	0.000475169
chr7	143294753	+	239	0.000475169
chr17	38385716	-	238	0.000473181
chr11	126233885	-	238	0.000473181
chr3	197116789	-	238	0.000473181
chr7	142702595	+	238	0.000473181
chr7	150704560	+	238	0.000473181
chrX	56819083	+	236	0.000469204
chr14	73456562	+	236	0.000469204
chr16	1665558	-	235	0.000467216
chr11	118595398	+	235	0.000467216
chr8	90143806	-	234	0.000465228
chr11	259829	+	234	0.000465228
chr19	47166512	+	234	0.000465228
chr17	39433252	-	232	0.000461252
chr11	654707	+	232	0.000461252
chr5	177250760	-	231	0.000459264
chr16	24756561	+	231	0.000459264
chr7	42795274	+	231	0.000459264
chr16	27715092	-	230	0.000457276
chr13	21152695	-	229	0.000455287
chr17	42345810	-	229	0.000455287
chr2	55347526	+	229	0.000455287
chr11	276943	+	228	0.000453299
chr6	2817158	+	228	0.000453299
chr17	7458815	-	227	0.000451311
chr9	129825977	-	226	0.000449323
chr11	66078887	+	225	0.000447335
chr3	12997709	+	224	0.000445347
chr11	259834	-	222	0.00044137
chr7	77777991	-	222	0.00044137
chr5	90480625	-	222	0.00044137
chr19	1374207	+	221	0.000439382
chr8	123030596	+	221	0.000439382
chr2	138560631	+	221	0.000439382
chr2	97905180	-	220	0.000437394
chr15	41701449	+	220	0.000437394
chr19	30008493	-	218	0.000433418
chr4	152391403	-	218	0.000433418
chr14	50182304	+	217	0.00043143
chr11	106015508	+	217	0.00043143
chr6	36522586	-	216	0.000429441
chr16	3388031	+	216	0.000429441
chr17	44462121	+	215	0.000427453
chr1	151448684	+	215	0.000427453
chr16	67592006	-	214	0.000425465
chr6	27334986	+	214	0.000425465
chr16	88841925	+	213	0.000423477
chr17	17545868	-	212	0.000421489
chr19	4406589	+	212	0.000421489
chr9	136453369	+	212	0.000421489
chr14	50182309	-	210	0.000417512
chr16	69649468	-	210	0.000417512
chr9	132348686	+	210	0.000417512
chr4	141076058	-	209	0.000415524
chr21	10798178	+	209	0.000415524
chr19	18716720	+	209	0.000415524
chr22	38503304	+	209	0.000415524
chr11	72063294	+	208	0.000413536
chr16	88584480	+	208	0.000413536
chr6	14337184	-	207	0.000411548
chr1	147549334	-	207	0.000411548
chr17	6629102	+	207	0.000411548
chr4	2614809	+	206	0.00040956
chr19	6787421	+	206	0.00040956
chr20	63903897	+	206	0.00040956
chr3	48711843	-	205	0.000407572
chr17	76775222	-	205	0.000407572
chr8	92697325	-	205	0.000407572
chr1	1099896	+	205	0.000407572
chr3	9367379	+	205	0.000407572
chr1	83162338	+	205	0.000407572
chr2	99368204	+	205	0.000407572
chr16	85676150	-	204	0.000405584
chr19	39939432	-	202	0.000401607
chr17	59927748	-	202	0.000401607
chr11	65986243	-	201	0.000399619
chr17	16185724	+	201	0.000399619
chr5	52802657	+	201	0.000399619
chr4	81176967	+	201	0.000399619
chr19	11619025	-	200	0.000397631
chr17	76767404	-	200	0.000397631
chr17	15713493	-	199	0.000395643
chr4	138247519	-	199	0.000395643
chr15	42808872	+	199	0.000395643
chr3	178673594	-	198	0.000393655
chr15	44639424	+	198	0.000393655
chr11	66110795	+	198	0.000393655
chr17	40148830	-	197	0.000391666
chr6	43550549	-	197	0.000391666
chr9	81236684	-	197	0.000391666
chr17	4346709	+	197	0.000391666
chr17	35066571	+	197	0.000391666
chr15	67578986	+	197	0.000391666
chr5	138191870	+	197	0.000391666
chr9	136817833	-	196	0.000389678
chr19	972445	-	195	0.00038769
chr17	59624075	-	195	0.00038769
chr2	180987357	-	195	0.00038769
chr6	149660274	+	194	0.000385702
chr17	75928976	-	193	0.000383714
chr3	125264567	+	193	0.000383714
chr6	135028708	+	193	0.000383714
chr22	21605458	-	192	0.000381726
chr20	1350657	+	192	0.000381726
chr16	29427859	+	191	0.000379738
chr11	758364	+	190	0.000377749
chr17	40837173	+	190	0.000377749
chr19	12942188	-	189	0.000375761
chr17	63657038	+	189	0.000375761
chr16	1685551	+	188	0.000373773
chr22	258918	+	188	0.000373773
chr12	64487441	+	188	0.000373773
chr8	144301250	-	187	0.000371785
chr5	62488080	-	186	0.000369797
chr7	143294758	-	186	0.000369797
chr18	57003718	+	186	0.000369797
chr8	89197209	-	185	0.000367809
chr8	39018043	-	184	0.00036582
chr2	224494627	-	184	0.00036582
chr16	3749138	+	184	0.00036582
chr1	51509631	-	183	0.000363832
chr22	16729985	-	181	0.000359856
chr17	43081234	+	181	0.000359856
chr17	59624070	+	181	0.000359856
chr1	158408317	+	181	0.000359856
chr10	32313068	-	180	0.000357868
chr6	4058799	+	180	0.000357868
chr17	47176018	+	180	0.000357868
chr11	67294015	+	180	0.000357868
chr22	29974387	-	179	0.00035588
chr17	42504761	+	179	0.00035588
chr3	42982174	+	179	0.00035588
chr20	41436835	+	178	0.000353892
chr9	128598267	+	178	0.000353892
chr9	136387275	-	177	0.000351903
chr12	112279134	+	177	0.000351903
chr11	66673866	-	176	0.000349915
chr12	121323328	-	175	0.000347927
chr14	39393827	+	175	0.000347927
chr19	3532178	-	174	0.000345939
chr4	55362214	-	174	0.000345939
chr17	59805650	-	174	0.000345939
chr16	15085565	+	174	0.000345939
chr1	179861817	+	174	0.000345939
chr12	48706320	+	173	0.000343951
chr19	10161514	-	172	0.000341963
chr3	100732575	+	172	0.000341963
chr6	14418563	-	171	0.000339974
chr1	23148896	-	171	0.000339974
chr4	169667659	-	171	0.000339974
chr2	100828006	+	171	0.000339974
chr1	42255358	-	170	0.000337986
chr15	40631605	+	169	0.000335998
chr5	62375669	+	169	0.000335998
chr6	26439175	+	168	0.00033401
chr17	64582400	+	168	0.00033401
chr2	96200497	+	168	0.00033401
chr2	231153071	+	168	0.00033401
chr16	1645090	-	167	0.000332022
chr17	46070129	-	167	0.000332022
chr11	72810024	-	167	0.000332022
chr16	1687400	+	167	0.000332022
chr16	3527324	+	167	0.000332022
chr16	53924196	+	167	0.000332022
chr5	56092477	+	167	0.000332022
chr17	47179596	-	166	0.000330034
chr11	656855	+	166	0.000330034
chr8	28999615	-	165	0.000328046
chr1	35392817	+	165	0.000328046
chr3	67569824	+	165	0.000328046
chr12	131722807	+	165	0.000328046
chr4	139357502	+	165	0.000328046
chr19	24026137	-	164	0.000326057
chr1	150647313	-	164	0.000326057
chr10	22693224	+	164	0.000326057
chr12	48699773	-	163	0.000324069
chr3	179838698	-	163	0.000324069
chr6	142783941	+	163	0.000324069
chr18	56924997	-	162	0.000322081
chr11	3366530	+	162	0.000322081
chr14	39079957	+	162	0.000322081
chr16	18897937	-	161	0.000320093
chr1	1113383	+	161	0.000320093
chr2	24813303	+	161	0.000320093
chr5	138374751	+	161	0.000320093
chr2	175938666	+	161	0.000320093
chr4	145163120	-	160	0.000318105
chr2	239623300	-	160	0.000318105
chr1	30966876	-	158	0.000314128
chr16	596601	+	158	0.000314128
chr1	28056538	+	158	0.000314128
chr1	32039280	+	158	0.000314128
chr3	126825855	+	158	0.000314128
chrX	15726348	-	157	0.00031214
chr8	54146525	-	156	0.000310152
chr20	49063995	+	156	0.000310152
chr5	52860173	+	156	0.000310152
chr11	128778050	+	156	0.000310152
chr16	3652046	-	155	0.000308164
chr12	32185092	-	155	0.000308164
chr22	50410706	-	155	0.000308164
chr2	68217367	-	155	0.000308164
chr2	73960802	-	155	0.000308164
chr7	129328971	-	155	0.000308164
chr17	3958916	+	155	0.000308164
chr19	12658847	+	155	0.000308164
chr16	67038349	-	154	0.000306176
chr5	111128721	-	154	0.000306176
chr1	42385324	-	153	0.000304188
chr8	53999600	-	153	0.000304188
chr3	52416863	+	153	0.000304188
chr11	276948	-	152	0.000302199
chr2	98655298	-	152	0.000302199
chr14	103946649	-	152	0.000302199
chr2	234279207	-	152	0.000302199
chr19	6206496	-	151	0.000300211
chr12	57409794	+	151	0.000300211
chr11	58611688	-	150	0.000298223
chr21	43667385	+	150	0.000298223
chr4	186635486	-	149	0.000296235
chr20	8259848	+	149	0.000296235
chr11	74961324	+	149	0.000296235
chr17	2117938	-	148	0.000294247
chr16	3614954	-	148	0.000294247
chr8	94502610	-	148	0.000294247
chr4	66664786	+	148	0.000294247
chr11	67294020	-	147	0.000292259
chr11	98197798	-	147	0.000292259
chr1	197594551	-	147	0.000292259
chr17	36964347	+	147	0.000292259
chr1	32847912	-	146	0.000290271
chr19	36063867	+	146	0.000290271
chr18	54131806	+	146	0.000290271
chr20	501915	+	144	0.000286294
chr17	81593441	-	143	0.000284306
chr22	39917050	+	143	0.000284306
chr17	50750624	+	143	0.000284306
chr4	1699386	+	142	0.000282318
chr11	7999401	+	142	0.000282318
chr16	47661254	+	142	0.000282318
chr17	82468580	+	142	0.000282318
chr2	61024878	-	141	0.00028033
chr5	96812614	-	141	0.00028033
chr12	132114369	+	141	0.00028033
chr19	46916451	-	140	0.000278342
chr2	61268102	-	140	0.000278342
chr1	88735490	-	140	0.000278342
chr21	31699762	+	140	0.000278342
chr19	49088629	+	140	0.000278342
chr2	75684403	+	140	0.000278342
chr7	151495334	+	140	0.000278342
chr5	12276344	-	139	0.000276353
chr16	29407254	-	139	0.000276353
chr10	31333350	-	139	0.000276353
chr11	34112399	-	139	0.000276353
chr12	19941740	+	139	0.000276353
chr4	55362209	+	139	0.000276353
chr7	92700065	-	138	0.000274365
chr1	145912448	-	138	0.000274365
chr19	14008698	-	137	0.000272377
chr9	123647819	-	137	0.000272377
chr2	168477902	-	137	0.000272377
chr1	1716476	+	137	0.000272377
chr17	28074802	+	137	0.000272377
chr16	67829861	+	137	0.000272377
chr8	143770213	+	137	0.000272377
chr6	149973216	+	137	0.000272377
chr4	51853515	-	136	0.000270389
chr2	233550444	-	136	0.000270389
chr1	13770944	+	136	0.000270389
chr4	23336012	+	136	0.000270389
chr6	113948804	+	136	0.000270389
chr17	5411394	-	135	0.000268401
chr8	11312334	+	135	0.000268401
chr4	77748382	+	135	0.000268401
chr17	49300976	-	134	0.000266413
chr12	51744983	+	134	0.000266413
chr15	90847429	+	134	0.000266413
chr2	17743976	+	133	0.000264425
chr1	29077877	+	133	0.000264425
chr2	232816647	+	133	0.000264425
chr12	9697346	-	132	0.000262436
chr7	62509225	-	132	0.000262436
chr8	130256548	-	132	0.000262436
chr15	41754742	+	132	0.000262436
chr19	47163471	+	132	0.000262436
chr4	82965559	+	132	0.000262436
chr12	102181997	+	132	0.000262436
chr2	239212219	+	132	0.000262436
chr3	47647206	-	131	0.000260448
chr6	73520292	-	131	0.000260448
chrX	103876083	-	131	0.000260448
chr10	101371397	-	131	0.000260448
chr12	131722812	-	131	0.000260448
chr1	90981450	+	131	0.000260448
chr6	31413757	+	130	0.00025846
chr1	40282032	+	130	0.00025846
chr1	1267515	+	129	0.000256472
chr19	55222467	+	129	0.000256472
chr3	129665713	+	129	0.000256472
chr3	85171023	-	128	0.000254484
chr8	94387854	-	128	0.000254484
chr12	5518078	+	128	0.000254484
chr16	53806875	+	128	0.000254484
chr7	131400430	+	128	0.000254484
chr17	20431429	-	127	0.000252496
chr6	31413762	-	127	0.000252496
chr16	67322279	-	127	0.000252496
chr1	97692773	-	127	0.000252496
chr9	123182142	-	127	0.000252496
chr2	174410675	-	127	0.000252496
chr15	64601566	-	126	0.000250507
chr19	3140122	-	125	0.000248519
chr16	28176070	-	125	0.000248519
chr2	159721881	-	125	0.000248519
chr3	185929242	-	125	0.000248519
chr19	49096782	+	125	0.000248519
chr14	106121350	+	125	0.000248519
chr16	3756358	-	124	0.000246531
chr8	94433664	-	124	0.000246531
chr1	189519159	-	124	0.000246531
chr3	39327373	-	123	0.000244543
chr17	60462411	-	123	0.000244543
chr16	74465482	-	123	0.000244543
chr17	7182077	+	123	0.000244543
chr2	8775885	+	123	0.000244543
chr19	10117922	-	122	0.000242555
chr7	128492620	-	122	0.000242555
chr14	60798921	+	122	0.000242555
chr1	114396596	+	122	0.000242555
chr8	135281727	+	122	0.000242555
chr3	47065612	-	121	0.000240567
chr9	97658572	-	121	0.000240567
chr11	13713578	+	121	0.000240567
chr17	47445354	+	121	0.000240567
chr11	74178375	+	121	0.000240567
chr12	81986126	+	121	0.000240567
chr16	89876358	-	120	0.000238579
chr1	28493181	+	120	0.000238579
chr4	186635481	+	120	0.000238579
chr1	228089740	+	120	0.000238579
chr13	38048485	-	119	0.00023659
chr14	30903180	+	119	0.00023659
chr6	31746475	+	119	0.00023659
chr7	139289048	-	118	0.000234602
chr17	16124772	+	118	0.000234602
chr8	23440303	+	118	0.000234602
chr1	32256953	+	118	0.000234602
chr4	139341708	+	118	0.000234602
chr16	23120996	-	117	0.000232614
chr3	56736683	-	117	0.000232614
chr7	56084032	+	117	0.000232614
chr12	118196929	+	117	0.000232614
chr4	174256091	+	117	0.000232614
chr3	47674342	-	116	0.000230626
chr4	88462132	-	116	0.000230626
chr12	124837402	-	116	0.000230626
chr6	156868448	-	116	0.000230626
chr16	1665553	+	116	0.000230626
chr17	8203009	+	116	0.000230626
chr22	29659777	+	116	0.000230626
chr1	43849355	+	116	0.000230626
chr3	72846290	+	116	0.000230626
chr7	105162389	+	116	0.000230626
chr17	2610595	-	115	0.000228638
chr19	49475971	-	115	0.000228638
chr21	44077215	+	115	0.000228638
chr11	122703241	+	115	0.000228638
chr19	49409538	-	114	0.00022665
chr16	81717826	-	114	0.00022665
chr11	118576188	-	114	0.00022665
chr6	119251990	-	114	0.00022665
chr4	169685838	-	114	0.00022665
chr12	49751790	+	114	0.00022665
chr19	49722732	+	114	0.00022665
chr5	78109526	+	114	0.00022665
chr1	93114117	+	114	0.00022665
chr6	137700931	+	114	0.00022665
chr1	153839538	+	114	0.00022665
chr10	14565605	-	113	0.000224661
chr12	21638173	-	113	0.000224661
chr3	133635847	+	113	0.000224661
chr14	21250072	-	112	0.000222673
chr14	39079962	-	112	0.000222673
chr2	241632702	-	112	0.000222673
chr20	25648445	+	112	0.000222673
chr17	40244144	+	112	0.000222673
chr11	64773625	+	112	0.000222673
chr2	186691171	+	112	0.000222673
chr4	15626189	-	111	0.000220685
chr17	28077866	-	111	0.000220685
chr15	90847434	-	111	0.000220685
chr9	128571024	-	111	0.000220685
chr12	132090498	-	111	0.000220685
chr17	82791472	+	111	0.000220685
chr17	81292631	-	110	0.000218697
chr17	29280179	+	110	0.000218697
chr3	130838049	+	110	0.000218697
chr16	332312	-	109	0.000216709
chr17	12027854	-	109	0.000216709
chr22	21598528	-	109	0.000216709
chr1	32823818	-	109	0.000216709
chrX	44966845	-	109	0.000216709
chr17	770161	+	109	0.000216709
chr19	47065855	+	109	0.000216709
chr17	16130363	-	108	0.000214721
chr10	130180406	-	108	0.000214721
chr11	34970777	+	108	0.000214721
chr3	152259007	+	108	0.000214721
chr5	180068010	+	108	0.000214721
chr6	34302801	-	107	0.000212733
chr20	64275667	-	107	0.000212733
chr17	82208353	-	107	0.000212733
chr2	111782387	-	107	0.000212733
chr10	113892441	-	107	0.000212733
chr7	16389497	+	107	0.000212733
chr2	28403655	+	107	0.000212733
chr3	49088326	+	107	0.000212733
chr20	41436840	-	106	0.000210744
chrX	1534273	+	106	0.000210744
chr19	41554296	+	106	0.000210744
chr18	62810155	+	106	0.000210744
chr3	174216885	+	106	0.000210744
chr16	18866119	-	105	0.000208756
chr19	39333445	-	105	0.000208756
chr10	72240099	-	105	0.000208756
chr14	24109530	+	105	0.000208756
chr6	167003160	+	105	0.000208756
chr7	24823475	-	104	0.000206768
chr2	44185150	-	104	0.000206768
chr12	50010816	-	104	0.000206768
chr17	78812316	-	104	0.000206768
chr14	93315682	-	104	0.000206768
chr5	103183560	-	104	0.000206768
chr17	78691438	+	104	0.000206768
chr5	138011385	+	104	0.000206768
chr6	73521235	-	103	0.00020478
chr19	48991041	+	103	0.00020478
chr10	68375221	+	103	0.00020478
chr13	20034394	-	102	0.000202792
chr22	50381655	-	102	0.000202792
chr8	111244618	-	102	0.000202792
chr17	29645257	+	102	0.000202792
chr13	79388126	+	102	0.000202792
chr6	136282147	+	102	0.000202792
chr8	144299985	+	102	0.000202792
chr11	583499	-	101	0.000200804
chr19	4966441	-	101	0.000200804
chr6	36044074	-	101	0.000200804
chr2	242108068	-	101	0.000200804
chr1	15894376	+	101	0.000200804
chr10	72306833	+	101	0.000200804
chr17	1858463	-	100	0.000198815
chr17	5396844	-	100	0.000198815
chr22	40057533	-	100	0.000198815
chr11	3741169	+	100	0.000198815
chr7	66938662	+	100	0.000198815
chr16	1756966	-	99	0.000196827
chr3	4898173	-	99	0.000196827
chr3	14163014	-	99	0.000196827
chr22	44466739	-	99	0.000196827
chr19	15258955	+	99	0.000196827
chr3	47063261	+	99	0.000196827
chr1	48743744	+	99	0.000196827
chr7	92700060	+	99	0.000196827
chr5	328640	-	98	0.000194839
chr19	575074	-	98	0.000194839
chr7	107488681	-	98	0.000194839
chr4	141096012	-	98	0.000194839
chr4	183664953	-	98	0.000194839
chr2	241281003	-	98	0.000194839
chr17	6945811	+	98	0.000194839
chr17	7873454	+	98	0.000194839
chr16	23463211	+	98	0.000194839
chr6	35008414	+	98	0.000194839
chr14	52400384	+	98	0.000194839
chr3	81695564	+	98	0.000194839
chr8	85200767	+	98	0.000194839
chr7	582080	-	97	0.000192851
chr17	44469619	-	97	0.000192851
chrX	47008014	-	97	0.000192851
chr1	10281311	+	97	0.000192851
chr22	40839878	+	97	0.000192851
chr5	75528904	+	97	0.000192851
chr4	118120959	+	97	0.000192851
chr12	124837397	+	97	0.000192851
chr1	235290156	+	97	0.000192851
chr19	876567	-	96	0.000190863
chr17	6945816	-	96	0.000190863
chr11	9198069	-	96	0.000190863
chr12	19154517	-	96	0.000190863
chr19	35205118	-	96	0.000190863
chr9	125754850	-	96	0.000190863
chr3	48449963	+	96	0.000190863
chr18	69874926	+	96	0.000190863
chr7	112269171	+	96	0.000190863
chr16	203943	-	95	0.000188875
chr19	7993395	-	95	0.000188875
chr16	18905926	-	95	0.000188875
chr10	72306838	-	95	0.000188875
chr9	124952112	-	95	0.000188875
chr6	149660279	-	95	0.000188875
chrX	154695887	-	95	0.000188875
chr16	434654	+	95	0.000188875
chr12	56160569	+	95	0.000188875
chr17	67843428	+	95	0.000188875
chr3	151396864	+	95	0.000188875
chr1	155685679	+	95	0.000188875
chr20	34415734	-	94	0.000186887
chr12	122091695	-	94	0.000186887
chr1	156776889	-	94	0.000186887
chr3	158162471	-	94	0.000186887
chr9	6471987	+	94	0.000186887
chr9	33702405	+	94	0.000186887
chr17	38904129	+	94	0.000186887
chr17	81591958	+	94	0.000186887
chr1	153912370	+	94	0.000186887
chr17	31246151	-	93	0.000184898
chr14	70934559	-	93	0.000184898
chr7	99523611	-	93	0.000184898
chr4	182892928	-	93	0.000184898
chr1	199068592	-	93	0.000184898
chrX	5038649	+	93	0.000184898
chr1	44976826	+	93	0.000184898
chr17	49329304	+	93	0.000184898
chr19	57364801	+	93	0.000184898
chr16	67570360	+	93	0.000184898
chr6	126041565	+	93	0.000184898
chr17	67214962	-	92	0.00018291
chr16	15026943	+	92	0.00018291
chr1	23703008	+	92	0.00018291
chr14	39337203	+	92	0.00018291
chr16	72650282	+	92	0.00018291
chr16	84742895	-	91	0.000180922
chr2	169568421	-	91	0.000180922
chr1	197117150	-	91	0.000180922
chr12	69260773	+	91	0.000180922
chr5	103183555	+	91	0.000180922
chr6	137701192	+	91	0.000180922
chr11	3957333	-	90	0.000178934
chr6	13653975	-	90	0.000178934
chr19	15945121	-	90	0.000178934
chr8	20263575	-	90	0.000178934
chr16	21898163	-	90	0.000178934
chr12	29353674	-	90	0.000178934
chr22	39089374	-	90	0.000178934
chr6	158320523	-	90	0.000178934
chr16	217992	+	90	0.000178934
chr4	1121103	+	90	0.000178934
chr19	8456424	+	90	0.000178934
chr13	25963805	+	90	0.000178934
chr6	35638517	+	90	0.000178934
chr4	139348928	+	90	0.000178934
chr1	150864938	+	90	0.000178934
chr1	1385740	-	89	0.000176946
chr19	2170867	-	89	0.000176946
chr7	16622028	-	89	0.000176946
chr19	45414688	-	89	0.000176946
chr11	46110982	-	89	0.000176946
chr2	127978416	-	89	0.000176946
chr1	154351059	-	89	0.000176946
chr1	161775152	-	89	0.000176946
chr11	654342	+	89	0.000176946
chr8	8242294	+	89	0.000176946
chr11	63635699	+	89	0.000176946
chr7	87948357	+	89	0.000176946
chr4	108028216	+	89	0.000176946
chr3	126635519	+	89	0.000176946
chr20	3964989	-	88	0.000174958
chr15	34924651	-	88	0.000174958
chr7	44808820	-	88	0.000174958
chr5	177217210	-	88	0.000174958
chr19	29983334	+	88	0.000174958
chr19	30009823	+	88	0.000174958
chr1	47305846	+	88	0.000174958
chr17	64091993	+	88	0.000174958
chr15	68076004	+	88	0.000174958
chr4	112167558	+	88	0.000174958
chr4	2855921	-	87	0.000172969
chr17	5310968	-	87	0.000172969
chr20	23927406	-	87	0.000172969
chr19	32932331	-	87	0.000172969
chr9	35492146	-	87	0.000172969
chr16	53806880	-	87	0.000172969
chr11	66092526	-	87	0.000172969
chr7	88455974	-	87	0.000172969
chr19	19021854	+	87	0.000172969
chr16	23844823	+	87	0.000172969
chr17	41691183	+	87	0.000172969
chr21	45717354	+	87	0.000172969
chr15	55182811	+	87	0.000172969
chr17	59134551	+	87	0.000172969
chr11	125659894	+	87	0.000172969
chr1	179986938	+	87	0.000172969
chr2	231279776	+	87	0.000172969
chr6	35888361	-	86	0.000170981
chr22	42599608	-	86	0.000170981
chr18	51075916	-	86	0.000170981
chr11	66356319	-	86	0.000170981
chr17	80256887	-	86	0.000170981
chr6	145700532	-	86	0.000170981
chr6	159785505	-	86	0.000170981
chr16	217934	+	86	0.000170981
chr1	59410624	+	86	0.000170981
chr7	74912433	+	86	0.000170981
chr3	87091070	+	86	0.000170981
chr19	3436777	-	85	0.000168993
chr1	52780685	-	85	0.000168993
chr15	55335684	-	85	0.000168993
chr18	72793789	-	85	0.000168993
chr1	111623301	-	85	0.000168993
chr10	116838024	-	85	0.000168993
chr9	136454255	-	85	0.000168993
chr1	229045238	-	85	0.000168993
chrY	1534273	+	85	0.000168993
chr1	27762346	+	85	0.000168993
chr20	35338623	+	85	0.000168993
chr1	39426167	+	85	0.000168993
chr21	43678682	+	85	0.000168993
chr13	46042653	+	85	0.000168993
chr15	55335679	+	85	0.000168993
chr3	109846996	+	85	0.000168993
chr5	121980073	+	85	0.000168993
chr17	2153962	-	84	0.000167005
chr18	2709386	-	84	0.000167005
chr1	20773789	-	84	0.000167005
chr1	185300492	-	84	0.000167005
chr14	64489087	+	84	0.000167005
chr15	90544843	+	84	0.000167005
chr7	152199420	+	84	0.000167005
chr10	11556544	-	83	0.000165017
chr17	28637031	-	83	0.000165017
chr4	53394993	-	83	0.000165017
chr11	65768558	-	83	0.000165017
chr14	80901686	-	83	0.000165017
chr15	84544404	-	83	0.000165017
chr10	87340427	-	83	0.000165017
chr12	111510038	-	83	0.000165017
chr12	10284661	+	83	0.000165017
chr2	112335075	+	83	0.000165017
chr19	811785	-	82	0.000163029
chr1	1394217	-	82	0.000163029
chr16	18858098	-	82	0.000163029
chr6	20187909	-	82	0.000163029
chr22	40246845	-	82	0.000163029
chr17	47269335	-	82	0.000163029
chr6	111405729	-	82	0.000163029
chr19	16334686	+	82	0.000163029
chr15	56523110	+	82	0.000163029
chr2	68187074	+	82	0.000163029
chr11	70307050	+	82	0.000163029
chr17	59134556	-	81	0.000161041
chr7	100876822	-	81	0.000161041
chr3	146229483	-	81	0.000161041
chr5	14332539	+	81	0.000161041
chr10	71835559	+	81	0.000161041
chr10	112669913	+	81	0.000161041
chr7	127783183	+	81	0.000161041
chr17	7226453	-	80	0.000159052
chr22	40831404	-	80	0.000159052
chr21	46352723	-	80	0.000159052
chr16	66818332	-	80	0.000159052
chr5	69646213	-	80	0.000159052
chr17	76763998	-	80	0.000159052
chr8	107311172	-	80	0.000159052
chr5	157839656	-	80	0.000159052
chr20	5562610	+	80	0.000159052
chr2	15235637	+	80	0.000159052
chr16	47497535	+	80	0.000159052
chr20	63717953	+	80	0.000159052
chr8	144300547	+	80	0.000159052
chr17	7488867	-	79	0.000157064
chr8	29108223	-	79	0.000157064
chr21	37409093	-	79	0.000157064
chr22	42246607	-	79	0.000157064
chrX	47564447	-	79	0.000157064
chr17	56846858	-	79	0.000157064
chr20	63905089	-	79	0.000157064
chr4	67614261	-	79	0.000157064
chr17	77412287	-	79	0.000157064
chr17	80316400	-	79	0.000157064
chr11	118601620	-	79	0.000157064
chr11	119702562	-	79	0.000157064
chr12	120868383	-	79	0.000157064
chr8	144167018	-	79	0.000157064
chr16	220156	+	79	0.000157064
chr17	7946679	+	79	0.000157064
chr22	28788433	+	79	0.000157064
chr1	37901909	+	79	0.000157064
chr6	108876178	+	79	0.000157064
chr8	123349237	+	79	0.000157064
chr8	125182049	+	79	0.000157064
chr1	41225074	-	78	0.000155076
chr20	57876658	-	78	0.000155076
chr20	63622587	-	78	0.000155076
chr11	63706939	-	78	0.000155076
chr4	83200110	-	78	0.000155076
chr1	1218647	+	78	0.000155076
chr19	6757526	+	78	0.000155076
chr1	19156744	+	78	0.000155076
chr8	42349025	+	78	0.000155076
chr20	50519438	+	78	0.000155076
chr4	51853510	+	78	0.000155076
chr17	8237786	-	77	0.000153088
chr2	23868137	-	77	0.000153088
chr16	30280653	-	77	0.000153088
chr7	32880243	-	77	0.000153088
chr9	36599112	-	77	0.000153088
chr7	154032124	-	77	0.000153088
chr5	179616451	-	77	0.000153088
chr4	17962023	+	77	0.000153088
chr22	31514612	+	77	0.000153088
chr4	55953589	+	77	0.000153088
chr1	235261725	+	77	0.000153088
chr19	10781865	-	76	0.0001511
chr6	15338133	-	76	0.0001511
chr16	30312059	-	76	0.0001511
chr17	82759532	-	76	0.0001511
chr9	112220375	-	76	0.0001511
chr12	124005540	-	76	0.0001511
chr8	144407176	-	76	0.0001511
chr3	197863286	-	76	0.0001511
chr19	7224264	+	76	0.0001511
chr19	18850350	+	76	0.0001511
chr19	39447068	+	76	0.0001511
chr3	49401800	+	76	0.0001511
chr15	78459325	+	76	0.0001511
chr9	128969024	+	76	0.0001511
chr5	138512421	+	76	0.0001511
chr1	155902128	+	76	0.0001511
chr5	177240690	+	76	0.0001511
chr17	1367800	-	75	0.000149112
chr17	4337561	-	75	0.000149112
chr19	7468077	-	75	0.000149112
chr7	24597701	-	75	0.000149112
chr20	35381489	-	75	0.000149112
chr18	50897225	-	75	0.000149112
chr12	121909035	-	75	0.000149112
chr16	3340633	+	75	0.000149112
chr4	64330114	+	75	0.000149112
chr19	1126986	-	74	0.000147123
chr16	2845363	-	74	0.000147123
chr16	58172197	-	74	0.000147123
chr4	82980060	-	74	0.000147123
chr2	134946066	-	74	0.000147123
chr19	8465868	+	74	0.000147123
chr19	8817141	+	74	0.000147123
chr11	34070039	+	74	0.000147123
chr3	48943121	+	74	0.000147123
chr14	65601639	+	74	0.000147123
chr2	98688732	+	74	0.000147123
chr10	17170613	-	73	0.000145135
chr22	41645594	-	73	0.000145135
chr18	2772921	+	73	0.000145135
chr22	30676644	+	73	0.000145135
chr17	40171636	+	73	0.000145135
chr3	48930677	+	73	0.000145135
chr14	91487915	+	73	0.000145135
chr7	99741599	+	73	0.000145135
chr12	120861188	+	73	0.000145135
chr1	214647832	+	73	0.000145135
chr19	6813592	-	72	0.000143147
chr22	27879411	-	72	0.000143147
chr20	37025384	-	72	0.000143147
chr6	37386614	-	72	0.000143147
chr7	87834659	-	72	0.000143147
chr16	89986639	-	72	0.000143147
chr5	134093225	-	72	0.000143147
chr2	181815459	-	72	0.000143147
chr16	199559	+	72	0.000143147
chr4	26996350	+	72	0.000143147
chr16	30498490	+	72	0.000143147
chr18	35101898	+	72	0.000143147
chr22	40092725	+	72	0.000143147
chr17	44427815	+	72	0.000143147
chr20	49165677	+	72	0.000143147
chr15	66418322	+	72	0.000143147
chr10	103991968	+	72	0.000143147
chr12	126949528	+	72	0.000143147
chr6	158104396	+	72	0.000143147
chr16	206748	-	71	0.000141159
chr19	5605508	-	71	0.000141159
chr19	6847077	-	71	0.000141159
chr6	28747821	-	71	0.000141159
chr19	42211062	-	71	0.000141159
chr15	42460967	-	71	0.000141159
chr12	49470224	-	71	0.000141159
chr17	66544479	-	71	0.000141159
chr17	81895016	-	71	0.000141159
chr1	957284	+	71	0.000141159
chr19	12942183	+	71	0.000141159
chr1	42250348	+	71	0.000141159
chr12	53620726	+	71	0.000141159
chr15	64325737	+	71	0.000141159
chr9	137790125	+	71	0.000141159
chr6	157293175	+	71	0.000141159
chr2	229866965	+	71	0.000141159
chr16	3749756	-	70	0.000139171
chr17	7488957	-	70	0.000139171
chr1	18952729	-	70	0.000139171
chr19	47162361	-	70	0.000139171
chr3	49996786	-	70	0.000139171
chr16	68089855	-	70	0.000139171
chr15	75849870	-	70	0.000139171
chr7	76572444	-	70	0.000139171
chr14	102355055	-	70	0.000139171
chr2	121628342	-	70	0.000139171
chr12	133009996	-	70	0.000139171
chr1	26461118	+	70	0.000139171
chr22	42599603	+	70	0.000139171
chr21	46478775	+	70	0.000139171
chr17	62012259	+	70	0.000139171
chr16	84758556	+	70	0.000139171
chrX	137232047	+	70	0.000139171
chr16	2440151	-	69	0.000137183
chr19	10784242	-	69	0.000137183
chr15	90789562	-	69	0.000137183
chr10	121840485	-	69	0.000137183
chr5	132634365	-	69	0.000137183
chr2	241368716	-	69	0.000137183
chr19	40758119	+	69	0.000137183
chr7	44094641	+	69	0.000137183
chr20	63905084	+	69	0.000137183
chr16	85675849	+	69	0.000137183
chr9	131697228	+	69	0.000137183
chrX	154049074	+	69	0.000137183
chr19	3158336	-	68	0.000135195
chr4	7836538	-	68	0.000135195
chr6	31538076	-	68	0.000135195
chr9	91319825	-	68	0.000135195
chr10	1039342	+	68	0.000135195
chr2	5676934	+	68	0.000135195
chr3	12645706	+	68	0.000135195
chr10	35427660	+	68	0.000135195
chr16	89146493	+	68	0.000135195
chr8	130256543	+	68	0.000135195
chr2	241321657	+	68	0.000135195
chr7	5004202	-	67	0.000133206
chr10	12020781	-	67	0.000133206
chr4	24546128	-	67	0.000133206
chr16	30363233	-	67	0.000133206
chr19	50389166	-	67	0.000133206
chr11	64546170	-	67	0.000133206
chr4	64794171	-	67	0.000133206
chr7	102033232	-	67	0.000133206
chr1	116541681	-	67	0.000133206
chr9	126445224	-	67	0.000133206
chr3	172811070	-	67	0.000133206
chr6	31671891	+	67	0.000133206
chr19	46875870	+	67	0.000133206
chr11	64325764	+	67	0.000133206
chr17	78727459	+	67	0.000133206
chr14	103993274	+	67	0.000133206
chrX	154329050	+	67	0.000133206
chr1	155837383	+	67	0.000133206
chr19	2148384	-	66	0.000131218
chr16	3659526	-	66	0.000131218
chr19	10561975	-	66	0.000131218
chr2	56928838	-	66	0.000131218
chr11	64773273	-	66	0.000131218
chr17	67210454	-	66	0.000131218
chr6	110546781	-	66	0.000131218
chr3	125264579	-	66	0.000131218
chr2	179161708	-	66	0.000131218
chr16	659423	+	66	0.000131218
chr16	1852554	+	66	0.000131218
chr19	10140291	+	66	0.000131218
chr2	28760716	+	66	0.000131218
chrX	48981987	+	66	0.000131218
chr9	85974675	+	66	0.000131218
chr8	111244613	+	66	0.000131218
chr7	142698651	+	66	0.000131218
chr17	1806922	-	65	0.00012923
chr16	2433371	-	65	0.00012923
chr17	7446772	-	65	0.00012923
chr16	17342190	-	65	0.00012923
chr13	20034406	-	65	0.00012923
chr5	34201091	-	65	0.00012923
chr19	47504321	-	65	0.00012923
chr1	51433262	-	65	0.00012923
chr4	56321484	-	65	0.00012923
chr17	62579836	-	65	0.00012923
chr13	62999778	-	65	0.00012923
chr4	109626333	-	65	0.00012923
chr19	1215658	+	65	0.00012923
chr16	11116973	+	65	0.00012923
chr6	15338128	+	65	0.00012923
chr6	26415427	+	65	0.00012923
chr16	57224404	+	65	0.00012923
chr11	63713263	+	65	0.00012923
chr17	81663759	+	65	0.00012923
chr7	100832916	+	65	0.00012923
chr10	103118581	+	65	0.00012923
chr2	108772800	+	65	0.00012923
chr12	798303	-	64	0.000127242
chr1	15903839	-	64	0.000127242
chr19	34206002	-	64	0.000127242
chr4	77056516	-	64	0.000127242
chr19	567393	+	64	0.000127242
chr19	1135173	+	64	0.000127242
chr21	17548968	+	64	0.000127242
chr22	37966139	+	64	0.000127242
chr13	41785362	+	64	0.000127242
chrX	47239561	+	64	0.000127242
chr11	81999080	+	64	0.000127242
chr12	92849849	+	64	0.000127242
chr9	120726666	+	64	0.000127242
chr2	174778365	+	64	0.000127242
chr7	5391473	-	63	0.000125254
chr16	19535950	-	63	0.000125254
chrX	24163321	-	63	0.000125254
chr7	27751623	-	63	0.000125254
chr22	31526406	-	63	0.000125254
chr1	35115008	-	63	0.000125254
chr12	57835901	-	63	0.000125254
chr16	68142808	-	63	0.000125254
chr16	89808640	-	63	0.000125254
chr11	2967850	+	63	0.000125254
chr12	8751293	+	63	0.000125254
chr17	30514007	+	63	0.000125254
chr6	32831577	+	63	0.000125254
chr16	33850715	+	63	0.000125254
chr22	38598424	+	63	0.000125254
chr21	46517773	+	63	0.000125254
chr15	49184688	+	63	0.000125254
chr14	104058715	+	63	0.000125254
chr2	111206947	+	63	0.000125254
chr7	151484793	+	63	0.000125254
chr2	171921448	+	63	0.000125254
chr7	2241587	-	62	0.000123266
chr17	32376471	-	62	0.000123266
chr16	32060436	-	62	0.000123266
chr19	49562606	-	62	0.000123266
chr12	123481524	-	62	0.000123266
chr9	127284456	-	62	0.000123266
chr5	137961162	-	62	0.000123266
chr8	144404203	-	62	0.000123266
chr17	2599793	+	62	0.000123266
chr11	11939188	+	62	0.000123266
chr19	16404877	+	62	0.000123266
chr8	86339639	+	62	0.000123266
chr19	1037776	-	61	0.000121277
chr17	43070846	-	61	0.000121277
chr7	44421504	-	61	0.000121277
chr21	44014417	-	61	0.000121277
chr14	54976686	-	61	0.000121277
chr7	74677437	-	61	0.000121277
chrX	106617550	-	61	0.000121277
chr11	117057770	-	61	0.000121277
chr1	184745324	-	61	0.000121277
chr12	352649	+	61	0.000121277
chr12	1146691	+	61	0.000121277
chr1	12302589	+	61	0.000121277
chr17	41921763	+	61	0.000121277
chr19	45137875	+	61	0.000121277
chr11	46589292	+	61	0.000121277
chr22	50360583	+	61	0.000121277
chr8	71303538	+	61	0.000121277
chr10	78987311	+	61	0.000121277
chr2	86737583	+	61	0.000121277
chr1	86716519	+	61	0.000121277
chr2	97835499	+	61	0.000121277
chr11	118405264	+	61	0.000121277
chr9	136454250	+	61	0.000121277
chr19	45843367	-	60	0.000119289
chr4	48592402	-	60	0.000119289
chr11	103147358	-	60	0.000119289
chr9	126446436	-	60	0.000119289
chr7	157192364	-	60	0.000119289
chr19	5950996	+	60	0.000119289
chr1	5963914	+	60	0.000119289
chr10	21596897	+	60	0.000119289
chr10	32019018	+	60	0.000119289
chr3	48071002	+	60	0.000119289
chr8	94442256	+	60	0.000119289
chr14	103341153	+	60	0.000119289
chr14	106415349	+	60	0.000119289
chr4	132229707	+	60	0.000119289
chr2	20283153	-	59	0.000117301
chr22	21807656	-	59	0.000117301
chr19	38819817	-	59	0.000117301
chr17	76315693	-	59	0.000117301
chr10	74188277	-	59	0.000117301
chr17	78727464	-	59	0.000117301
chr14	94055065	-	59	0.000117301
chr12	106970066	-	59	0.000117301
chr12	112279139	-	59	0.000117301
chr1	150441952	-	59	0.000117301
chr16	226062	+	59	0.000117301
chr18	999896	+	59	0.000117301
chr19	37348165	+	59	0.000117301
chr17	82573818	+	59	0.000117301
chr9	131486830	+	59	0.000117301
chr9	132661169	+	59	0.000117301
chr1	204507026	+	59	0.000117301
chr4	1188034	-	58	0.000115313
chr19	2933513	-	58	0.000115313
chr18	5166500	-	58	0.000115313
chr19	16404882	-	58	0.000115313
chr16	22363603	-	58	0.000115313
chr3	48450533	-	58	0.000115313
chr12	79889880	-	58	0.000115313
chr16	87751139	-	58	0.000115313
chr13	102848336	-	58	0.000115313
chr4	103173927	-	58	0.000115313
chr7	139270600	-	58	0.000115313
chr19	12811179	+	58	0.000115313
chr19	34206976	+	58	0.000115313
chr14	35196519	+	58	0.000115313
chr20	38507978	+	58	0.000115313
chr3	47054481	+	58	0.000115313
chr17	76219227	+	58	0.000115313
chr8	73619994	+	58	0.000115313
chrX	154783762	+	58	0.000115313
chr17	8577918	-	57	0.000113325
chr6	26378347	-	57	0.000113325
chr5	109845238	-	57	0.000113325
chr7	1982950	+	57	0.000113325
chr1	11221565	+	57	0.000113325
chr15	42421683	+	57	0.000113325
chr20	58323862	+	57	0.000113325
chr14	91492969	+	57	0.000113325
chr12	97721728	+	57	0.000113325
chr9	137571483	+	57	0.000113325
chr1	215610954	+	57	0.000113325
chr5	7896886	-	56	0.000111337
chr1	11221593	-	56	0.000111337
chr8	11824657	-	56	0.000111337
chr2	23885348	-	56	0.000111337
chr1	26564208	-	56	0.000111337
chr13	35566531	-	56	0.000111337
chr19	39150017	-	56	0.000111337
chr20	59930611	-	56	0.000111337
chr17	82468094	-	56	0.000111337
chr8	80019560	-	56	0.000111337
chr14	102024274	-	56	0.000111337
chr9	104121987	-	56	0.000111337
chr11	129274897	-	56	0.000111337
chr17	3836928	+	56	0.000111337
chr8	11824655	+	56	0.000111337
chr19	15945116	+	56	0.000111337
chr1	28040917	+	56	0.000111337
chr20	43951361	+	56	0.000111337
chrX	47008009	+	56	0.000111337
chr19	47190036	+	56	0.000111337
chr5	76853505	+	56	0.000111337
chr12	92178576	+	56	0.000111337
chr6	127315630	+	56	0.000111337
chr19	1596941	-	55	0.000109349
chr1	31281848	-	55	0.000109349
chr19	34193758	-	55	0.000109349
chr19	45419936	-	55	0.000109349
chr17	49760974	-	55	0.000109349
chr20	53598321	-	55	0.000109349
chr18	62756335	-	55	0.000109349
chr14	63498465	-	55	0.000109349
chr15	90726676	-	55	0.000109349
chr14	93248127	-	55	0.000109349
chr11	117025410	-	55	0.000109349
chr8	117802994	-	55	0.000109349
chr11	120407104	-	55	0.000109349
chr12	122770854	-	55	0.000109349
chr19	11003918	+	55	0.000109349
chr6	20779038	+	55	0.000109349
chr17	29262102	+	55	0.000109349
chr17	49671344	+	55	0.000109349
chr16	69012030	+	55	0.000109349
chr2	69663704	+	55	0.000109349
chr5	98778123	+	55	0.000109349
chr9	104121982	+	55	0.000109349
chr8	140843526	+	55	0.000109349
chrX	149920221	+	55	0.000109349
chr2	241337424	+	55	0.000109349
chr17	2287577	-	54	0.00010736
chr17	4019637	-	54	0.00010736
chr7	7575854	-	54	0.00010736
chr16	29540655	-	54	0.00010736
chr16	30288999	-	54	0.00010736
chr22	37876768	-	54	0.00010736
chr19	48242946	-	54	0.00010736
chr11	62630862	-	54	0.00010736
chr14	63489630	-	54	0.00010736
chr17	82195689	-	54	0.00010736
chr10	100955699	-	54	0.00010736
chr14	21413113	+	54	0.00010736
chr16	29515286	+	54	0.00010736
chr19	39150012	+	54	0.00010736
chr19	39960637	+	54	0.00010736
chr19	40329610	+	54	0.00010736
chr17	45304325	+	54	0.00010736
chr22	45730800	+	54	0.00010736
chr17	81568482	+	54	0.00010736
chr14	80737692	+	54	0.00010736
chr11	125011745	+	54	0.00010736
chr3	141513795	+	54	0.00010736
chr1	212737860	+	54	0.00010736
chrY	13361092	-	53	0.000105372
chr19	16639654	-	53	0.000105372
chr4	26872327	-	53	0.000105372
chr22	31473428	-	53	0.000105372
chr19	38693386	-	53	0.000105372
chr3	52269291	-	53	0.000105372
chr17	55083770	-	53	0.000105372
chr14	65514273	-	53	0.000105372
chr14	91500706	-	53	0.000105372
chr10	110591706	-	53	0.000105372
chr9	121188422	-	53	0.000105372
chr5	177218144	-	53	0.000105372
chr16	2600035	+	53	0.000105372
chr6	31567470	+	53	0.000105372
chr6	42571646	+	53	0.000105372
chr19	49871146	+	53	0.000105372
chr12	53022826	+	53	0.000105372
chr17	79998950	+	53	0.000105372
chr16	89796042	+	53	0.000105372
chr9	89485315	+	53	0.000105372
chr9	92439904	+	53	0.000105372
chr9	109111892	+	53	0.000105372
chr7	148838494	+	53	0.000105372
chr5	171990828	+	53	0.000105372
chr16	3083119	-	52	0.000103384
chr7	11042753	-	52	0.000103384
chr20	15164411	-	52	0.000103384
chr1	23970092	-	52	0.000103384
chr17	28833702	-	52	0.000103384
chr19	46360616	-	52	0.000103384
chr3	48949559	-	52	0.000103384
chr3	57816117	-	52	0.000103384
chr11	71972176	-	52	0.000103384
chr4	95977156	-	52	0.000103384
chr9	112252975	-	52	0.000103384
chr3	136601719	-	52	0.000103384
chr2	181375478	-	52	0.000103384
chr16	1622786	+	52	0.000103384
chr16	4487736	+	52	0.000103384
chr16	30255271	+	52	0.000103384
chr8	47816696	+	52	0.000103384
chr12	48704334	+	52	0.000103384
chr14	55019801	+	52	0.000103384
chr11	67423600	+	52	0.000103384
chr2	73396964	+	52	0.000103384
chr9	97673929	+	52	0.000103384
chr3	117951287	+	52	0.000103384
chr8	124484839	+	52	0.000103384
chr9	133367356	+	52	0.000103384
chr3	136865595	+	52	0.000103384
chr16	2600040	-	51	0.000101396
chr16	29700949	-	51	0.000101396
chr16	67057826	-	51	0.000101396
chr1	67358087	-	51	0.000101396
chr9	65679708	-	51	0.000101396
chr2	97956706	-	51	0.000101396
chr6	111392703	-	51	0.000101396
chr3	112918656	-	51	0.000101396
chr9	132840709	-	51	0.000101396
chr5	224500	+	51	0.000101396
chr19	811043	+	51	0.000101396
chr17	1842924	+	51	0.000101396
chr19	2903219	+	51	0.000101396
chr9	6467118	+	51	0.000101396
chr16	28176232	+	51	0.000101396
chr9	33892902	+	51	0.000101396
chr19	38682942	+	51	0.000101396
chr7	43512675	+	51	0.000101396
chr12	53471839	+	51	0.000101396
chr20	57760944	+	51	0.000101396
chr14	73338615	+	51	0.000101396
chr2	101811438	+	51	0.000101396
chr7	150617840	+	51	0.000101396
chr2	241321284	+	51	0.000101396
chr4	2875773	-	50	9.94077e-05
chr19	4946167	-	50	9.94077e-05
chr3	17514746	-	50	9.94077e-05
chrX	48536632	-	50	9.94077e-05
chr20	59877046	-	50	9.94077e-05
chr16	70013868	-	50	9.94077e-05
chr7	107176048	-	50	9.94077e-05
chr16	430814	+	50	9.94077e-05
chr1	1882462	+	50	9.94077e-05
chr19	8468993	+	50	9.94077e-05
chr10	22146971	+	50	9.94077e-05
chr17	29470695	+	50	9.94077e-05
chr16	30671281	+	50	9.94077e-05
chr6	38067811	+	50	9.94077e-05
chr19	46371531	+	50	9.94077e-05
chr3	52647808	+	50	9.94077e-05
chr2	61280764	+	50	9.94077e-05
chr15	63131305	+	50	9.94077e-05
chr15	64341790	+	50	9.94077e-05
chr2	70240203	+	50	9.94077e-05
chr17	72902964	+	50	9.94077e-05
chr15	77289555	+	50	9.94077e-05
chr1	184749260	+	50	9.94077e-05
chr4	2615952	-	49	9.74196e-05
chr6	5567625	-	49	9.74196e-05
chr1	10281316	-	49	9.74196e-05
chr19	18583707	-	49	9.74196e-05
chr22	30350024	-	49	9.74196e-05
chr17	36992215	-	49	9.74196e-05
chr19	39361223	-	49	9.74196e-05
chr13	41730047	-	49	9.74196e-05
chr11	58608613	-	49	9.74196e-05
chr14	58288729	-	49	9.74196e-05
chr14	61724074	-	49	9.74196e-05
chr11	66750096	-	49	9.74196e-05
chr9	127631276	-	49	9.74196e-05
chr1	155694968	-	49	9.74196e-05
chr16	2051213	+	49	9.74196e-05
chr7	2979167	+	49	9.74196e-05
chr1	10583213	+	49	9.74196e-05
chr10	11557531	+	49	9.74196e-05
chr21	18445735	+	49	9.74196e-05
chr9	20917337	+	49	9.74196e-05
chr18	31865842	+	49	9.74196e-05
chr6	32181039	+	49	9.74196e-05
chr20	34441677	+	49	9.74196e-05
chr22	35776627	+	49	9.74196e-05
chrX	45048556	+	49	9.74196e-05
chr19	49563548	+	49	9.74196e-05
chr1	52532465	+	49	9.74196e-05
chr4	56250302	+	49	9.74196e-05
chr19	58494498	+	49	9.74196e-05
chr8	60622268	+	49	9.74196e-05
chr17	76770069	+	49	9.74196e-05
chr3	94845345	+	49	9.74196e-05
chr7	152171826	+	49	9.74196e-05
chr7	157192359	+	49	9.74196e-05
chr2	241292000	+	49	9.74196e-05
chr1	247167746	+	49	9.74196e-05
chr1	247981852	+	49	9.74196e-05
chr17	16085420	-	48	9.54314e-05
chr17	18056832	-	48	9.54314e-05
chr1	24802477	-	48	9.54314e-05
chr21	39271563	-	48	9.54314e-05
chr15	72564264	-	48	9.54314e-05
chr2	127272812	-	48	9.54314e-05
chr2	135638575	-	48	9.54314e-05
chr7	152312546	-	48	9.54314e-05
chr5	157805428	-	48	9.54314e-05
chr4	163977880	-	48	9.54314e-05
chr22	21797357	+	48	9.54314e-05
chr14	30931082	+	48	9.54314e-05
chr22	49816227	+	48	9.54314e-05
chr19	55061418	+	48	9.54314e-05
chr11	65433888	+	48	9.54314e-05
chr10	74950361	+	48	9.54314e-05
chr17	80728755	+	48	9.54314e-05
chr11	3367713	-	47	9.34433e-05
chr18	21071867	-	47	9.34433e-05
chr16	29438890	-	47	9.34433e-05
chr5	33766763	-	47	9.34433e-05
chr22	40869018	-	47	9.34433e-05
chr1	45452076	-	47	9.34433e-05
chr3	49324672	-	47	9.34433e-05
chr3	50093686	-	47	9.34433e-05
chr11	65567109	-	47	9.34433e-05
chr16	89764870	-	47	9.34433e-05
chr10	98160537	-	47	9.34433e-05
chr4	102531150	-	47	9.34433e-05
chr4	127819073	-	47	9.34433e-05
chr3	130999990	-	47	9.34433e-05
chr2	135623512	-	47	9.34433e-05
chr1	153878052	-	47	9.34433e-05
chr1	154260514	-	47	9.34433e-05
chr2	216194500	-	47	9.34433e-05
chr19	4435399	+	47	9.34433e-05
chr9	6002004	+	47	9.34433e-05
chr17	46037649	+	47	9.34433e-05
chr20	50546957	+	47	9.34433e-05
chr22	50329397	+	47	9.34433e-05
chr9	91295384	+	47	9.34433e-05
chr3	100726989	+	47	9.34433e-05
chr10	130180401	+	47	9.34433e-05
chr5	143340258	+	47	9.34433e-05
chr3	154271611	+	47	9.34433e-05
chr1	26549155	-	46	9.14551e-05
chr21	31699767	-	46	9.14551e-05
chr17	39490634	-	46	9.14551e-05
chr14	39158874	-	46	9.14551e-05
chr12	57056894	-	46	9.14551e-05
chr11	66647364	-	46	9.14551e-05
chr7	76595996	-	46	9.14551e-05
chr7	100337985	-	46	9.14551e-05
chr5	139319680	-	46	9.14551e-05
chr6	152996973	-	46	9.14551e-05
chr1	206361484	-	46	9.14551e-05
chr4	1918328	+	46	9.14551e-05
chr17	2672146	+	46	9.14551e-05
chr7	5747132	+	46	9.14551e-05
chr19	12603019	+	46	9.14551e-05
chr13	27096080	+	46	9.14551e-05
chr11	62774865	+	46	9.14551e-05
chr5	66041105	+	46	9.14551e-05
chr12	68615703	+	46	9.14551e-05
chr2	74066753	+	46	9.14551e-05
chr12	121997991	+	46	9.14551e-05
chr7	131459863	+	46	9.14551e-05
chr3	181231749	+	46	9.14551e-05
chr3	197434562	+	46	9.14551e-05
chr1	227076762	+	46	9.14551e-05
chr1	229467179	+	46	9.14551e-05
chr2	229825865	+	46	9.14551e-05
chr19	654950	-	45	8.9467e-05
chr7	2429450	-	45	8.9467e-05
chr7	11043913	-	45	8.9467e-05
chr16	14842677	-	45	8.9467e-05
chr17	38903273	-	45	8.9467e-05
chr21	46503400	-	45	8.9467e-05
chr14	58296295	-	45	8.9467e-05
chr17	64108457	-	45	8.9467e-05
chr17	75944705	-	45	8.9467e-05
chr12	107023827	-	45	8.9467e-05
chr3	129404851	-	45	8.9467e-05
chr18	5161839	+	45	8.9467e-05
chr11	6590767	+	45	8.9467e-05
chr19	12878758	+	45	8.9467e-05
chr8	19819767	+	45	8.9467e-05
chr16	29427555	+	45	8.9467e-05
chr1	32048813	+	45	8.9467e-05
chr19	39963648	+	45	8.9467e-05
chr15	41685006	+	45	8.9467e-05
chr19	54206093	+	45	8.9467e-05
chr17	81615065	+	45	8.9467e-05
chr10	96914663	+	45	8.9467e-05
chr10	101962429	+	45	8.9467e-05
chr8	119783809	+	45	8.9467e-05
chr4	132229507	+	45	8.9467e-05
chr7	158772968	+	45	8.9467e-05
chr17	683826	-	44	8.74788e-05
chr1	13761094	-	44	8.74788e-05
chr6	31746482	-	44	8.74788e-05
chr3	50005152	-	44	8.74788e-05
chr16	57237783	-	44	8.74788e-05
chr17	80714383	-	44	8.74788e-05
chr17	81663762	-	44	8.74788e-05
chr4	78790124	-	44	8.74788e-05
chr17	82578219	-	44	8.74788e-05
chr16	89987057	-	44	8.74788e-05
chr10	114130144	-	44	8.74788e-05
chr12	120505283	-	44	8.74788e-05
chr7	139175799	-	44	8.74788e-05
chrX	153889452	-	44	8.74788e-05
chr3	195694477	-	44	8.74788e-05
chr16	1625268	+	44	8.74788e-05
chr1	20954038	+	44	8.74788e-05
chr6	45194165	+	44	8.74788e-05
chr12	50008362	+	44	8.74788e-05
chr12	50447312	+	44	8.74788e-05
chr12	53601058	+	44	8.74788e-05
chr15	63218090	+	44	8.74788e-05
chr16	70443987	+	44	8.74788e-05
chr17	78048265	+	44	8.74788e-05
chr13	77155031	+	44	8.74788e-05
chr15	98672597	+	44	8.74788e-05
chr11	103219808	+	44	8.74788e-05
chr9	127800448	+	44	8.74788e-05
chr11	130897068	+	44	8.74788e-05
chr5	140285636	+	44	8.74788e-05
chr5	159202911	+	44	8.74788e-05
chr3	195381273	+	44	8.74788e-05
chr2	229907850	+	44	8.74788e-05
chr19	7775649	-	43	8.54906e-05
chr7	11116006	-	43	8.54906e-05
chr1	11275286	-	43	8.54906e-05
chr7	16244109	-	43	8.54906e-05
chr17	21028188	-	43	8.54906e-05
chr16	29447240	-	43	8.54906e-05
chr22	42597388	-	43	8.54906e-05
chr1	47305851	-	43	8.54906e-05
chr14	49583360	-	43	8.54906e-05
chr11	62616823	-	43	8.54906e-05
chr11	73074683	-	43	8.54906e-05
chr10	73356347	-	43	8.54906e-05
chr4	78878443	-	43	8.54906e-05
chr16	88589372	-	43	8.54906e-05
chr12	110217972	-	43	8.54906e-05
chrX	149559276	-	43	8.54906e-05
chr3	194421855	-	43	8.54906e-05
chr3	196117122	-	43	8.54906e-05
chr5	349568	+	43	8.54906e-05
chr19	1436250	+	43	8.54906e-05
chr16	18829886	+	43	8.54906e-05
chr2	26055449	+	43	8.54906e-05
chr17	43063767	+	43	8.54906e-05
chr22	42254835	+	43	8.54906e-05
chr16	47598632	+	43	8.54906e-05
chr19	47185504	+	43	8.54906e-05
chr3	49745714	+	43	8.54906e-05
chr6	57114642	+	43	8.54906e-05
chr1	63455481	+	43	8.54906e-05
chr5	109823647	+	43	8.54906e-05
chr6	137202097	+	43	8.54906e-05
chr3	138752819	+	43	8.54906e-05
chr1	219981511	+	43	8.54906e-05
chr5	242878	-	42	8.35025e-05
chr9	5689798	-	42	8.35025e-05
chr19	14549047	-	42	8.35025e-05
chr17	16079452	-	42	8.35025e-05
chr16	29569674	-	42	8.35025e-05
chr14	34862423	-	42	8.35025e-05
chr20	41612681	-	42	8.35025e-05
chr7	44417430	-	42	8.35025e-05
chr14	71494914	-	42	8.35025e-05
chr16	89771973	-	42	8.35025e-05
chr6	119199540	-	42	8.35025e-05
chr9	123010794	-	42	8.35025e-05
chr9	128468508	-	42	8.35025e-05
chr12	132581435	-	42	8.35025e-05
chr3	133499682	-	42	8.35025e-05
chr9	136460437	-	42	8.35025e-05
chr7	148811584	-	42	8.35025e-05
chr1	156036137	-	42	8.35025e-05
chr4	2875785	+	42	8.35025e-05
chr18	25297001	+	42	8.35025e-05
chr16	28472970	+	42	8.35025e-05
chr16	29700944	+	42	8.35025e-05
chr19	34177164	+	42	8.35025e-05
chr22	40229785	+	42	8.35025e-05
chr8	42279951	+	42	8.35025e-05
chr19	52667105	+	42	8.35025e-05
chr16	57543198	+	42	8.35025e-05
chr17	77975594	+	42	8.35025e-05
chr17	81597192	+	42	8.35025e-05
chr17	82141506	+	42	8.35025e-05
chr17	82261823	+	42	8.35025e-05
chr5	81523403	+	42	8.35025e-05
chr15	99695122	+	42	8.35025e-05
chr3	119839646	+	42	8.35025e-05
chr1	171506296	+	42	8.35025e-05
chr3	180966274	+	42	8.35025e-05
chr16	208766	-	41	8.15143e-05
chr17	4338473	-	41	8.15143e-05
chr11	10186241	-	41	8.15143e-05
chr17	18187143	-	41	8.15143e-05
chr7	23349346	-	41	8.15143e-05
chr14	30239559	-	41	8.15143e-05
chr6	34295170	-	41	8.15143e-05
chr21	45173549	-	41	8.15143e-05
chrX	47855578	-	41	8.15143e-05
chr3	47769951	-	41	8.15143e-05
chr21	46494130	-	41	8.15143e-05
chr14	58437794	-	41	8.15143e-05
chr14	65066589	-	41	8.15143e-05
chr17	75332797	-	41	8.15143e-05
chr16	89328483	-	41	8.15143e-05
chr1	114424193	-	41	8.15143e-05
chr5	137955303	-	41	8.15143e-05
chr7	152228427	-	41	8.15143e-05
chr2	165938122	-	41	8.15143e-05
chr1	211984709	-	41	8.15143e-05
chr17	3824984	+	41	8.15143e-05
chr19	12718041	+	41	8.15143e-05
chr16	15000551	+	41	8.15143e-05
chr8	22494337	+	41	8.15143e-05
chr22	37477994	+	41	8.15143e-05
chr3	47091946	+	41	8.15143e-05
chr12	49430623	+	41	8.15143e-05
chr16	53492899	+	41	8.15143e-05
chr16	67606744	+	41	8.15143e-05
chr2	97579028	+	41	8.15143e-05
chr11	106620047	+	41	8.15143e-05
chr2	114369571	+	41	8.15143e-05
chr9	132290043	+	41	8.15143e-05
chr6	144752284	+	41	8.15143e-05
chr8	144514844	+	41	8.15143e-05
chr1	198163261	+	41	8.15143e-05
chr2	201044899	+	41	8.15143e-05
chr5	380851	-	40	7.95262e-05
chr17	2596689	-	40	7.95262e-05
chr19	2802866	-	40	7.95262e-05
chr12	9664939	-	40	7.95262e-05
chr14	21883861	-	40	7.95262e-05
chr7	24613537	-	40	7.95262e-05
chr16	29548976	-	40	7.95262e-05
chr16	30710431	-	40	7.95262e-05
chr1	31003039	-	40	7.95262e-05
chr3	49100170	-	40	7.95262e-05
chr12	49382128	-	40	7.95262e-05
chr5	55419867	-	40	7.95262e-05
chr20	57865932	-	40	7.95262e-05
chr11	66065265	-	40	7.95262e-05
chr5	77711264	-	40	7.95262e-05
chr9	78250387	-	40	7.95262e-05
chr11	86030153	-	40	7.95262e-05
chr16	89802258	-	40	7.95262e-05
chr4	98882691	-	40	7.95262e-05
chr5	109390211	-	40	7.95262e-05
chr12	122545938	-	40	7.95262e-05
chrX	148530274	-	40	7.95262e-05
chr2	159269549	-	40	7.95262e-05
chr5	178155433	-	40	7.95262e-05
chr5	179617989	-	40	7.95262e-05
chr5	179730290	-	40	7.95262e-05
chr17	4356819	+	40	7.95262e-05
chr10	12015528	+	40	7.95262e-05
chr10	27519355	+	40	7.95262e-05
chr1	32255642	+	40	7.95262e-05
chr22	42949848	+	40	7.95262e-05
chr20	48786874	+	40	7.95262e-05
chr8	47880103	+	40	7.95262e-05
chr19	48335816	+	40	7.95262e-05
chr15	58596911	+	40	7.95262e-05
chr10	89710686	+	40	7.95262e-05
chr10	96535555	+	40	7.95262e-05
chr3	123495113	+	40	7.95262e-05
chr9	136376004	+	40	7.95262e-05
chrX	155590248	+	40	7.95262e-05
chr2	190681143	+	40	7.95262e-05
chr19	1427012	-	39	7.7538e-05
chr16	2058391	-	39	7.7538e-05
chr14	21376297	-	39	7.7538e-05
chr7	22957025	-	39	7.7538e-05
chr2	28755158	-	39	7.7538e-05
chr18	32714330	-	39	7.7538e-05
chr20	37712146	-	39	7.7538e-05
chr1	40242721	-	39	7.7538e-05
chr3	49964784	-	39	7.7538e-05
chr3	51442461	-	39	7.7538e-05
chr12	65546734	-	39	7.7538e-05
chr16	68169614	-	39	7.7538e-05
chr17	78753024	-	39	7.7538e-05
chr9	83686709	-	39	7.7538e-05
chr10	87873239	-	39	7.7538e-05
chr5	98365334	-	39	7.7538e-05
chr7	130922713	-	39	7.7538e-05
chr4	132989854	-	39	7.7538e-05
chr17	2143499	+	39	7.7538e-05
chr7	5749460	+	39	7.7538e-05
chr19	11002898	+	39	7.7538e-05
chr1	11189992	+	39	7.7538e-05
chr11	14771599	+	39	7.7538e-05
chr3	15389249	+	39	7.7538e-05
chr1	16292181	+	39	7.7538e-05
chr18	21051782	+	39	7.7538e-05
chr10	32953820	+	39	7.7538e-05
chr9	35230617	+	39	7.7538e-05
chr15	41111267	+	39	7.7538e-05
chr13	42184581	+	39	7.7538e-05
chr18	70118960	+	39	7.7538e-05
chr2	69639059	+	39	7.7538e-05
chr10	68379761	+	39	7.7538e-05
chr9	68245754	+	39	7.7538e-05
chr7	100108570	+	39	7.7538e-05
chr3	128752470	+	39	7.7538e-05
chr8	144215073	+	39	7.7538e-05
chr7	150483740	+	39	7.7538e-05
chr6	159740114	+	39	7.7538e-05
chr2	227533961	+	39	7.7538e-05
chr19	4421905	-	38	7.55499e-05
chr3	14984778	-	38	7.55499e-05
chr16	29563582	-	38	7.55499e-05
chr9	37139976	-	38	7.55499e-05
chr1	42191258	-	38	7.55499e-05
chr12	45483796	-	38	7.55499e-05
chr6	47274618	-	38	7.55499e-05
chr19	50003115	-	38	7.55499e-05
chr16	67091024	-	38	7.55499e-05
chr16	74459089	-	38	7.55499e-05
chr16	75598949	-	38	7.55499e-05
chr7	77111269	-	38	7.55499e-05
chr17	81628305	-	38	7.55499e-05
chr12	79850402	-	38	7.55499e-05
chrX	97897579	-	38	7.55499e-05
chr12	120805380	-	38	7.55499e-05
chr12	123319315	-	38	7.55499e-05
chr2	163552830	-	38	7.55499e-05
chr1	226275955	-	38	7.55499e-05
chr16	2160040	+	38	7.55499e-05
chr16	2260606	+	38	7.55499e-05
chr17	4334809	+	38	7.55499e-05
chr16	30295585	+	38	7.55499e-05
chr22	29932387	+	38	7.55499e-05
chr1	31319568	+	38	7.55499e-05
chr19	39351427	+	38	7.55499e-05
chr3	47464900	+	38	7.55499e-05
chrX	48932474	+	38	7.55499e-05
chr17	56266691	+	38	7.55499e-05
chr5	78215163	+	38	7.55499e-05
chrX	78659109	+	38	7.55499e-05
chr12	85529543	+	38	7.55499e-05
chr14	105997526	+	38	7.55499e-05
chr12	116190198	+	38	7.55499e-05
chr9	136817828	+	38	7.55499e-05
chr5	177542929	+	38	7.55499e-05
chr3	196745321	+	38	7.55499e-05
chr2	199280149	+	38	7.55499e-05
chr10	331649	-	37	7.35617e-05
chr17	1541636	-	37	7.35617e-05
chrX	1566362	-	37	7.35617e-05
chr16	2444638	-	37	7.35617e-05
chr16	3845472	-	37	7.35617e-05
chr17	5443007	-	37	7.35617e-05
chr2	9897198	-	37	7.35617e-05
chr12	32066969	-	37	7.35617e-05
chr15	34143537	-	37	7.35617e-05
chr3	39401506	-	37	7.35617e-05
chr7	43600840	-	37	7.35617e-05
chr21	45674023	-	37	7.35617e-05
chr17	60375370	-	37	7.35617e-05
chr11	65287990	-	37	7.35617e-05
chr9	70340535	-	37	7.35617e-05
chr17	80620789	-	37	7.35617e-05
chr10	88553923	-	37	7.35617e-05
chr2	109920406	-	37	7.35617e-05
chr11	129017910	-	37	7.35617e-05
chr7	138566725	-	37	7.35617e-05
chr9	135873885	-	37	7.35617e-05
chr4	145106353	-	37	7.35617e-05
chr3	146525797	-	37	7.35617e-05
chr1	158481382	-	37	7.35617e-05
chr2	171397996	-	37	7.35617e-05
chr6	7144641	+	37	7.35617e-05
chr2	9535588	+	37	7.35617e-05
chr19	12615853	+	37	7.35617e-05
chr9	37143383	+	37	7.35617e-05
chr11	47166225	+	37	7.35617e-05
chr12	49205890	+	37	7.35617e-05
chr20	64209436	+	37	7.35617e-05
chr20	64274791	+	37	7.35617e-05
chr12	62901513	+	37	7.35617e-05
chr11	66791854	+	37	7.35617e-05
chr5	68291061	+	37	7.35617e-05
chr14	75758978	+	37	7.35617e-05
chr14	91487332	+	37	7.35617e-05
chr13	106553979	+	37	7.35617e-05
chr3	125296779	+	37	7.35617e-05
chr9	136812728	+	37	7.35617e-05
chr7	404047	+	37	7.35617e-05
chr8	144629569	+	37	7.35617e-05
chr2	232255792	+	37	7.35617e-05
chr16	3614437	-	36	7.15736e-05
chr17	6597086	-	36	7.15736e-05
chr10	6585921	-	36	7.15736e-05
chr1	28949453	-	36	7.15736e-05
chr6	31798704	-	36	7.15736e-05
chr6	36505210	-	36	7.15736e-05
chr1	42289808	-	36	7.15736e-05
chr22	42576029	-	36	7.15736e-05
chr1	43839205	-	36	7.15736e-05
chr4	54035432	-	36	7.15736e-05
chr1	70334358	-	36	7.15736e-05
chr5	79651048	-	36	7.15736e-05
chr16	79154894	-	36	7.15736e-05
chr16	87361715	-	36	7.15736e-05
chr13	88113588	-	36	7.15736e-05
chr9	131674330	-	36	7.15736e-05
chr8	143683552	-	36	7.15736e-05
chr1	148771306	-	36	7.15736e-05
chr1	207434348	-	36	7.15736e-05
chr4	2638467	+	36	7.15736e-05
chr22	21855810	+	36	7.15736e-05
chr17	28084886	+	36	7.15736e-05
chr22	37636028	+	36	7.15736e-05
chr19	38181044	+	36	7.15736e-05
chr22	38551686	+	36	7.15736e-05
chr6	41862923	+	36	7.15736e-05
chr19	46888439	+	36	7.15736e-05
chr3	48952813	+	36	7.15736e-05
chr14	49827341	+	36	7.15736e-05
chr1	65157274	+	36	7.15736e-05
chr14	65545315	+	36	7.15736e-05
chr11	66646441	+	36	7.15736e-05
chr13	79368910	+	36	7.15736e-05
chr9	92623568	+	36	7.15736e-05
chr12	120783991	+	36	7.15736e-05
chr8	123780083	+	36	7.15736e-05
chr12	132043056	+	36	7.15736e-05
chr8	144269144	+	36	7.15736e-05
chr4	146512779	+	36	7.15736e-05
chr5	169763349	+	36	7.15736e-05
[truncated: 3,155 more rows]
