# Supplementary figures and images for: Infection with a newly designed dual fluorescent reporter HIV-1 effectively identifies latently infected CD4+ T cells
Source: eLife journal article supplement (doi:10.7554/elife.63810), 2021-04-09

**Figure 2-figure supplement 1**

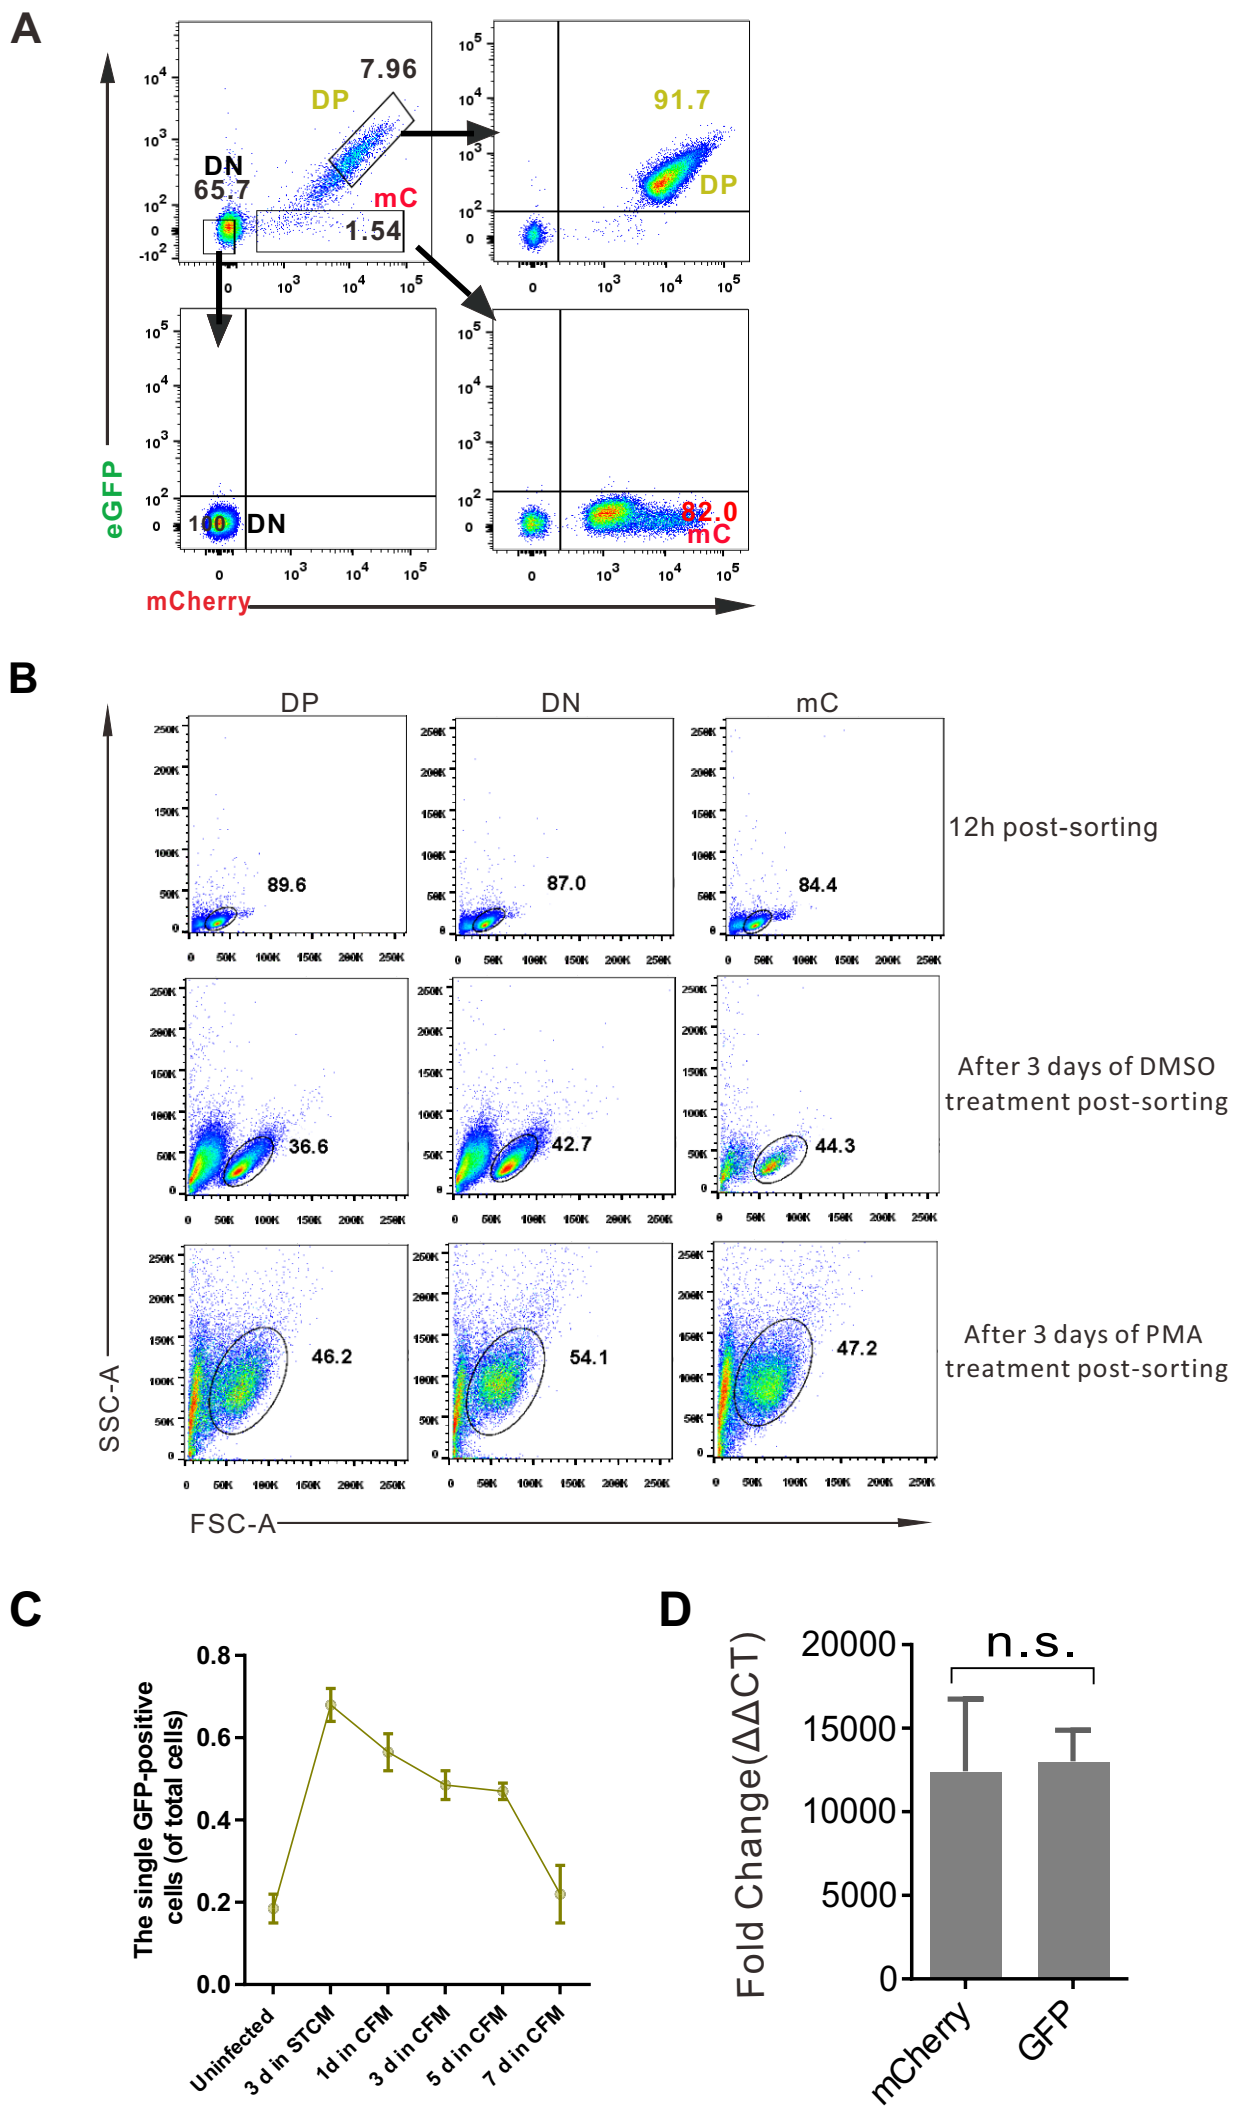

Supplement: supp [file elife-63810-supp-v1.zip › elife_poa_e63810_Figure_2_figure_supplement_1.pdf]

Figure 4-figure supplement 1

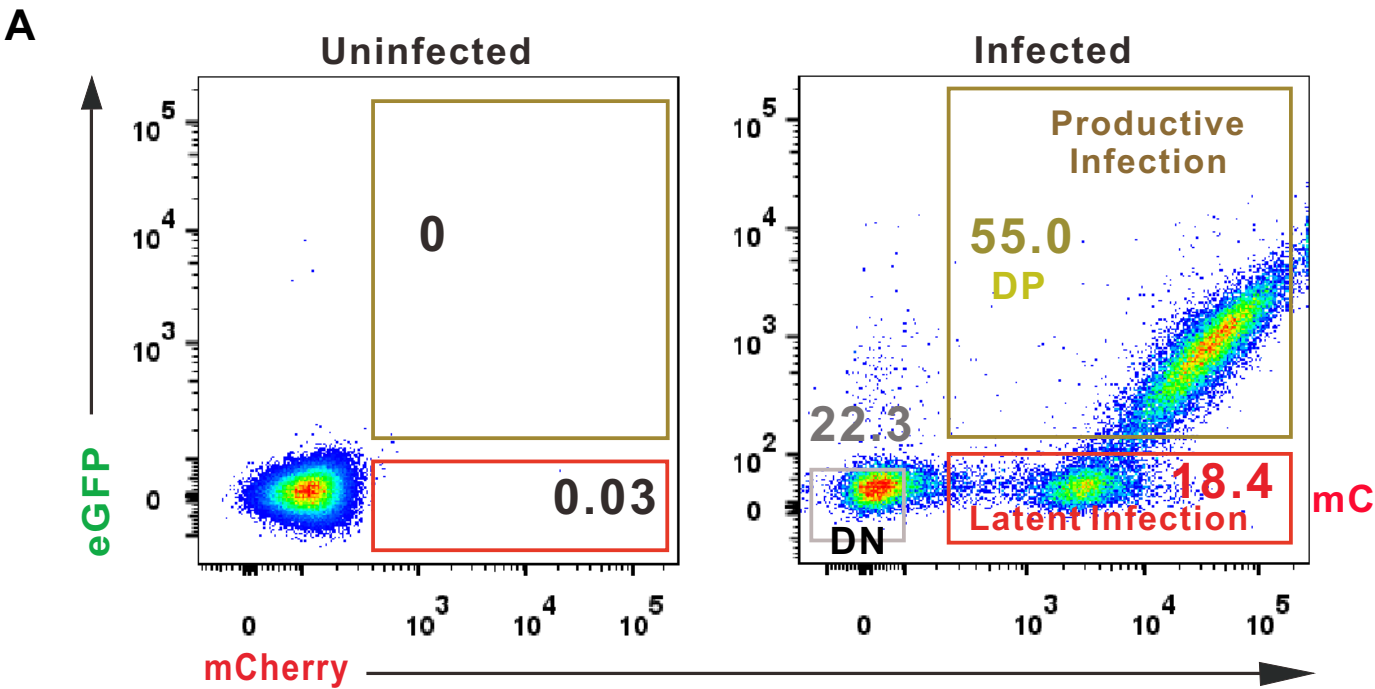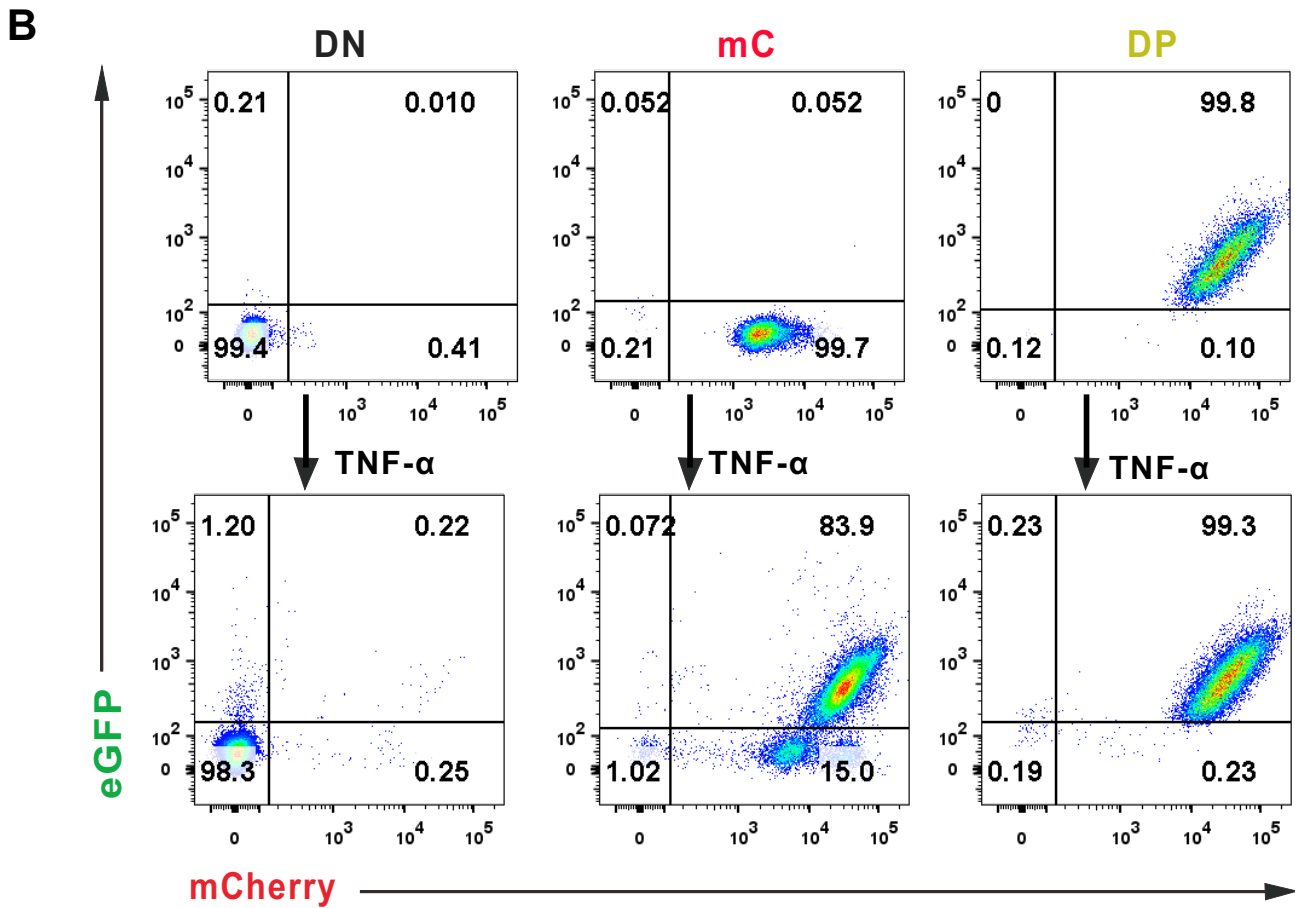

Supplement: supp [file elife-63810-supp-v1.zip › elife_poa_e63810_Figure_4_figure_supplement_1.pdf]

**Figure 6-figure supplement 1**

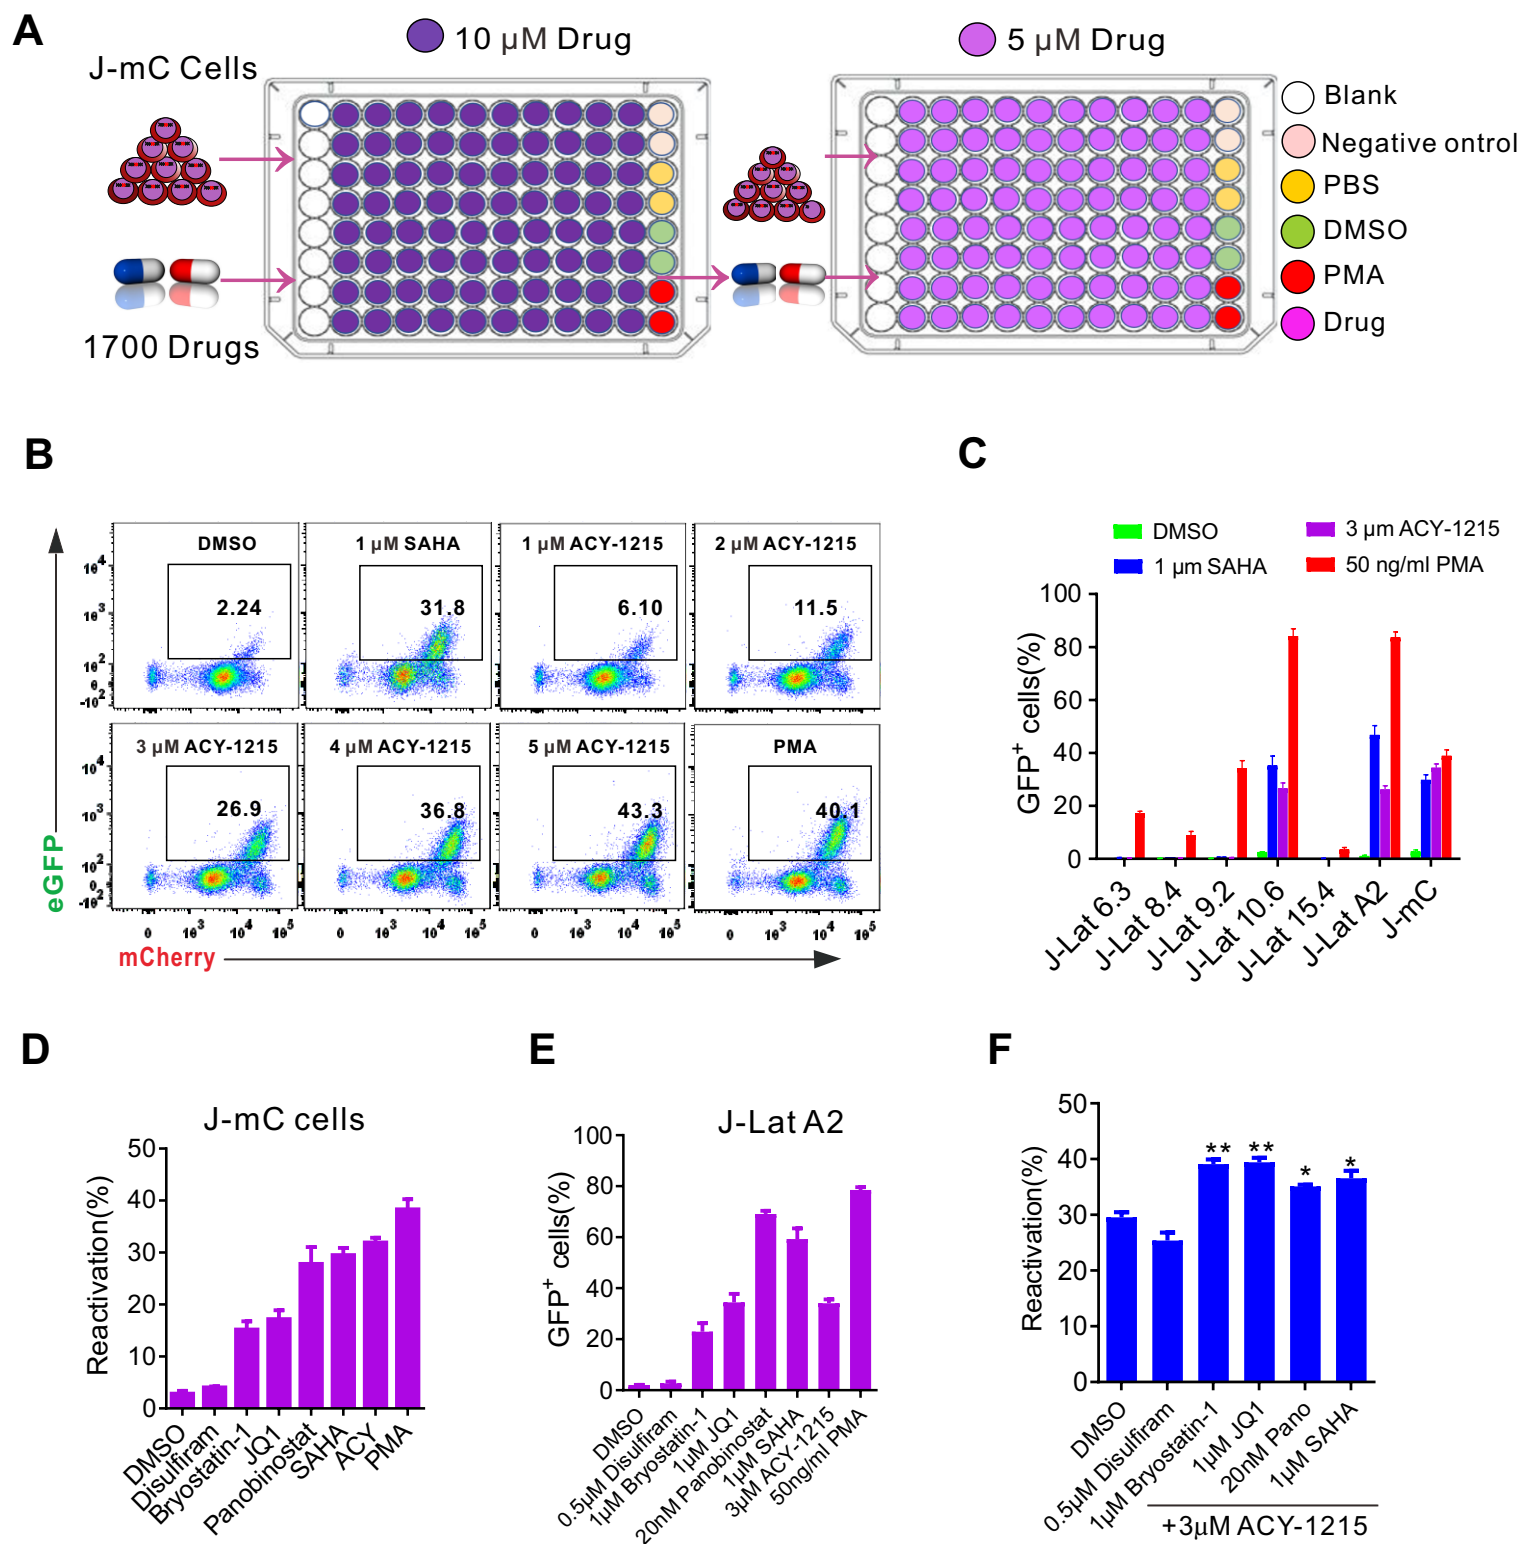

Supplement: supp [file elife-63810-supp-v1.zip › elife_poa_e63810_Figure_6_figure_supplement_1.pdf]

Figure 6-figure supplement 2

A

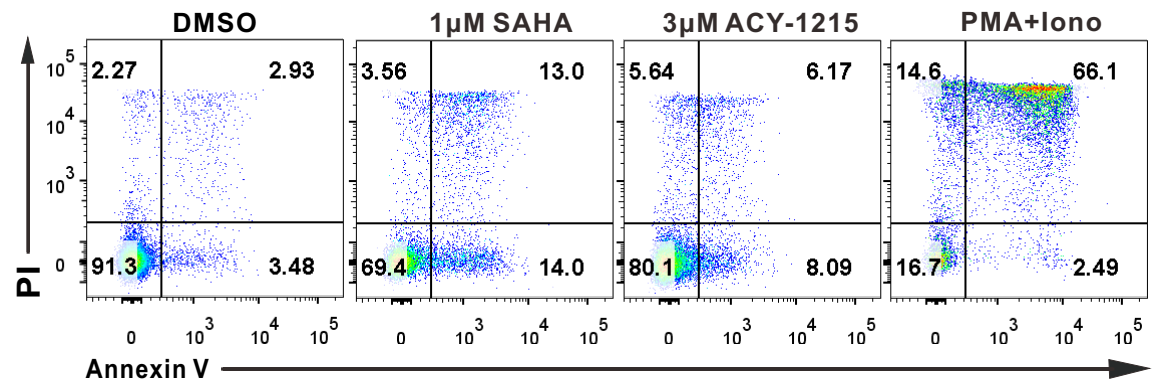

B

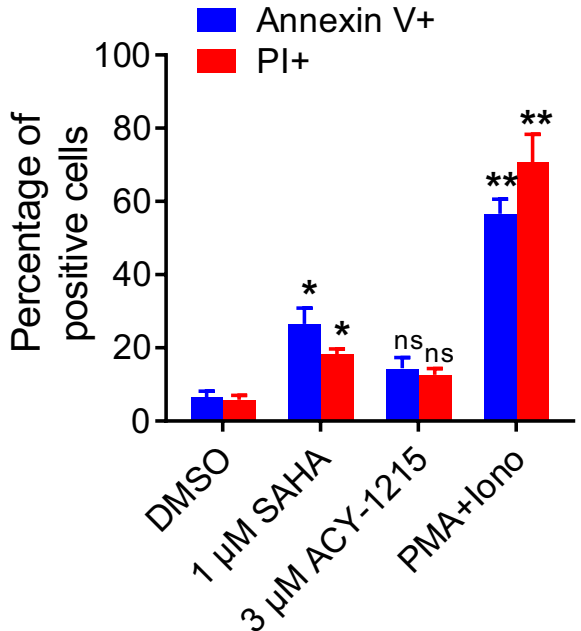

C

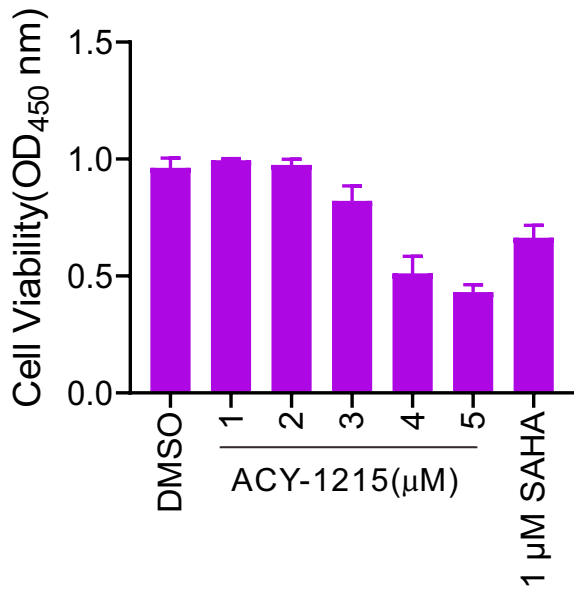

Supplement: supp [file elife-63810-supp-v1.zip › elife_poa_e63810_Figure_6_figure_supplement_2.pdf]

Figure 6-figure supplement 3

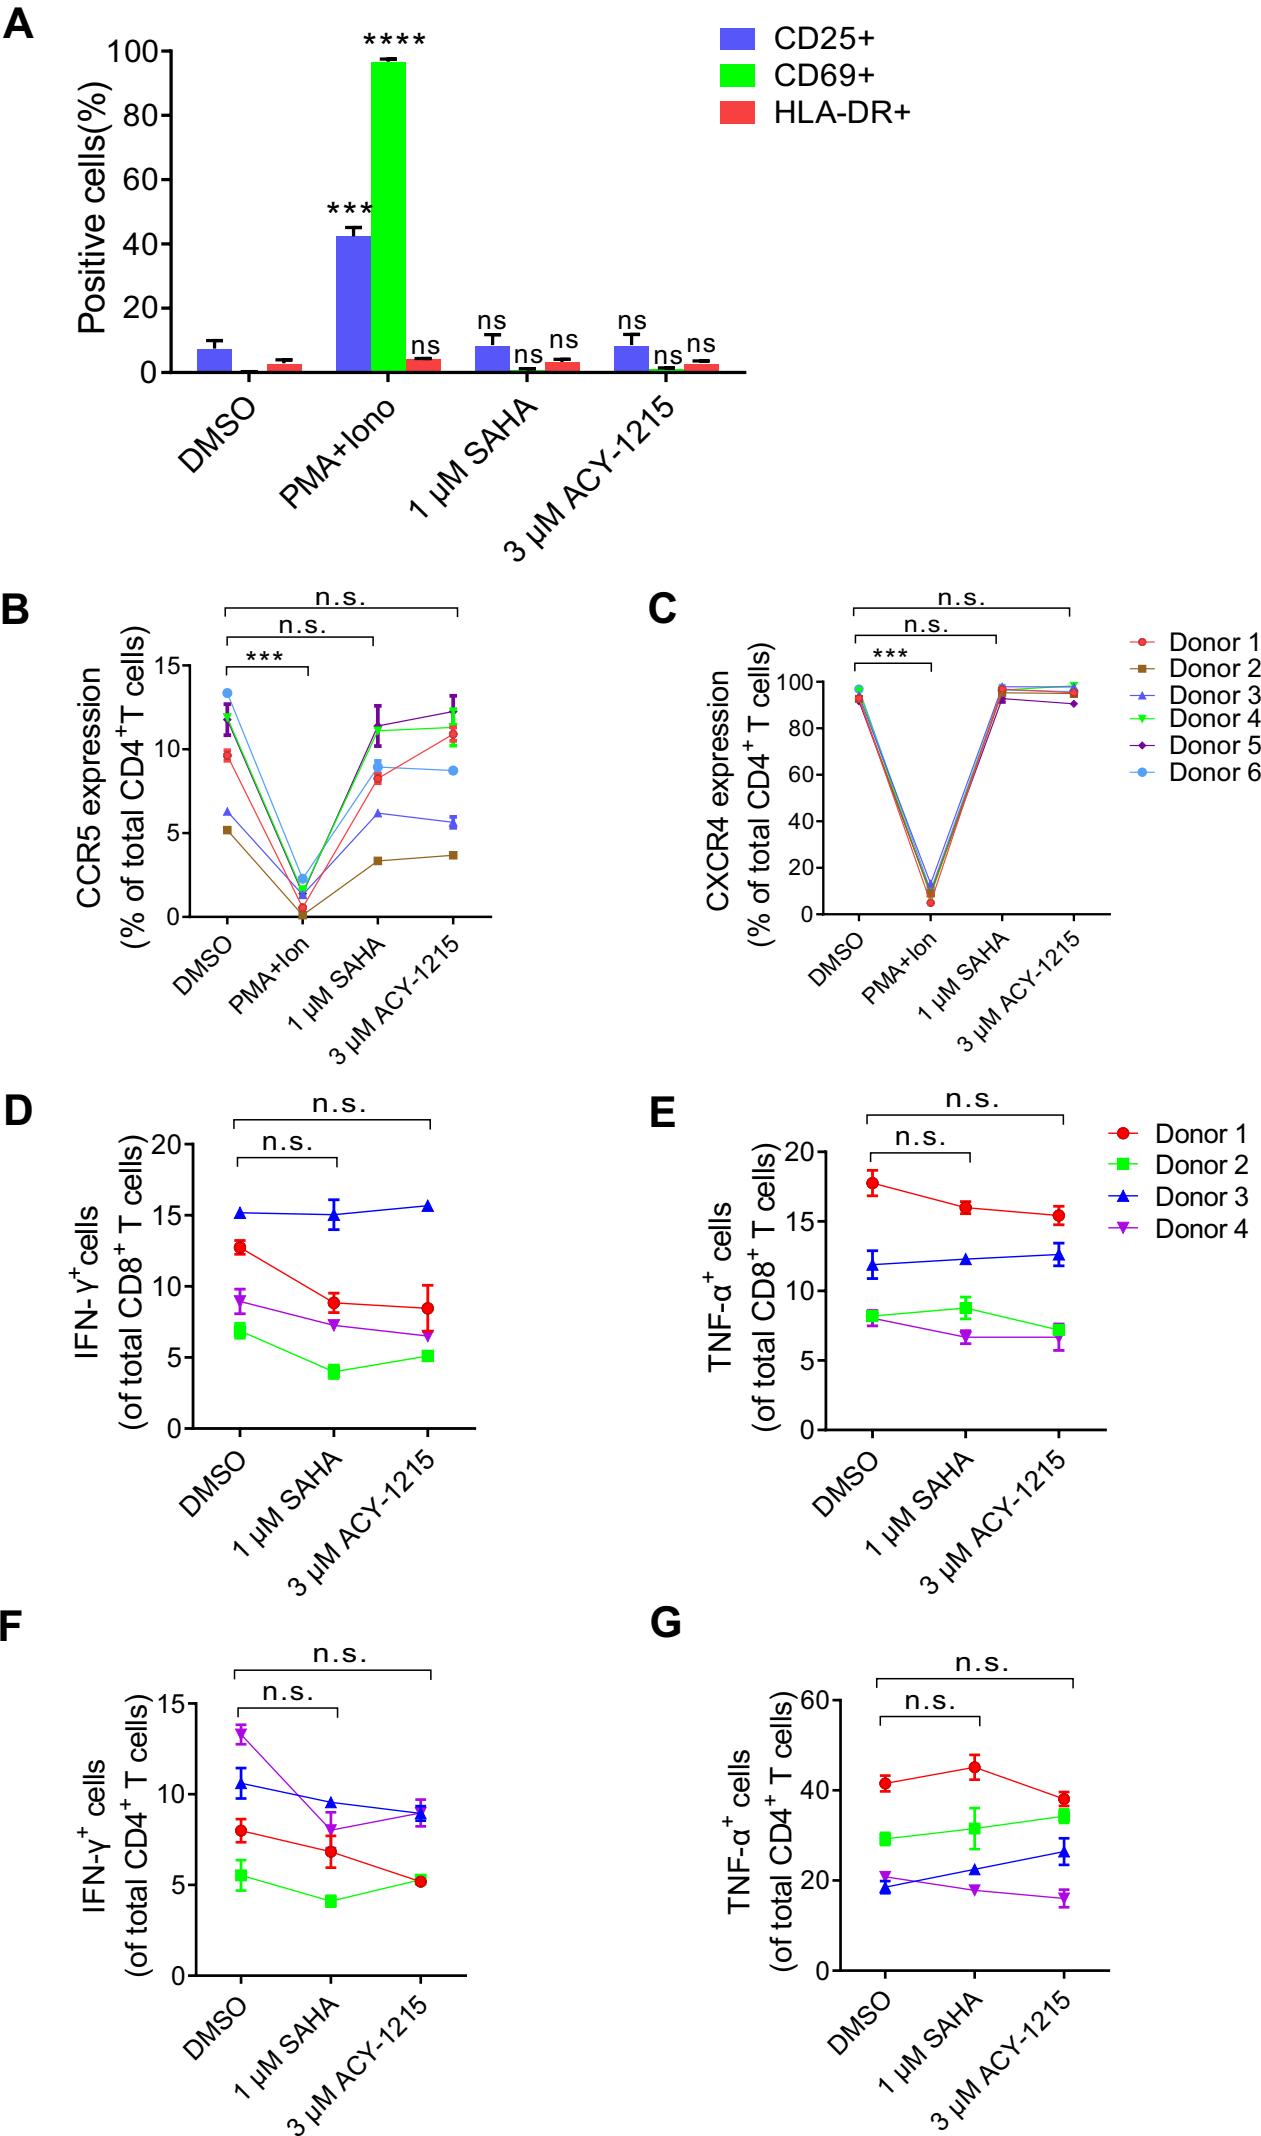

Supplement: supp [file elife-63810-supp-v1.zip › elife_poa_e63810_Figure_6_figure_supplement_3.pdf]
